# Supplementary material for: Phenotype-Genotype Association Analysis of ACTH-Secreting Pituitary Adenoma and Its Molecular Link to Patient Osteoporosis
Source: PubMed Central journal article supplement (PMC5085687; doi:10.3390/ijms17101654), 2016-09-29
Supplement: ijms-17-01654-s001.pdf [file ijms-17-01654-s001.pdf]

# Supplementary Material: Phenotype-Genotype Association Analysis of ACTH-Secreting Pituitary Adenoma and Its Molecular Link to Patient Osteoporosis

Renzhi Wang, Yakun Yang, Miaomiao Sheng, Dechao Bu, Fengming Huang, Xiaohai Liu, Cuiqi Zhou, Congxin Dai, Bowen Sun, Jindong Zhu, Yi Qiao, Yong Yao, Huijuan Zhu, Lin Lu, Hui Pan, Ming Feng, Kan Deng, Bing Xing, Wei Lian, Yi Zhao and Chengyu Jiang

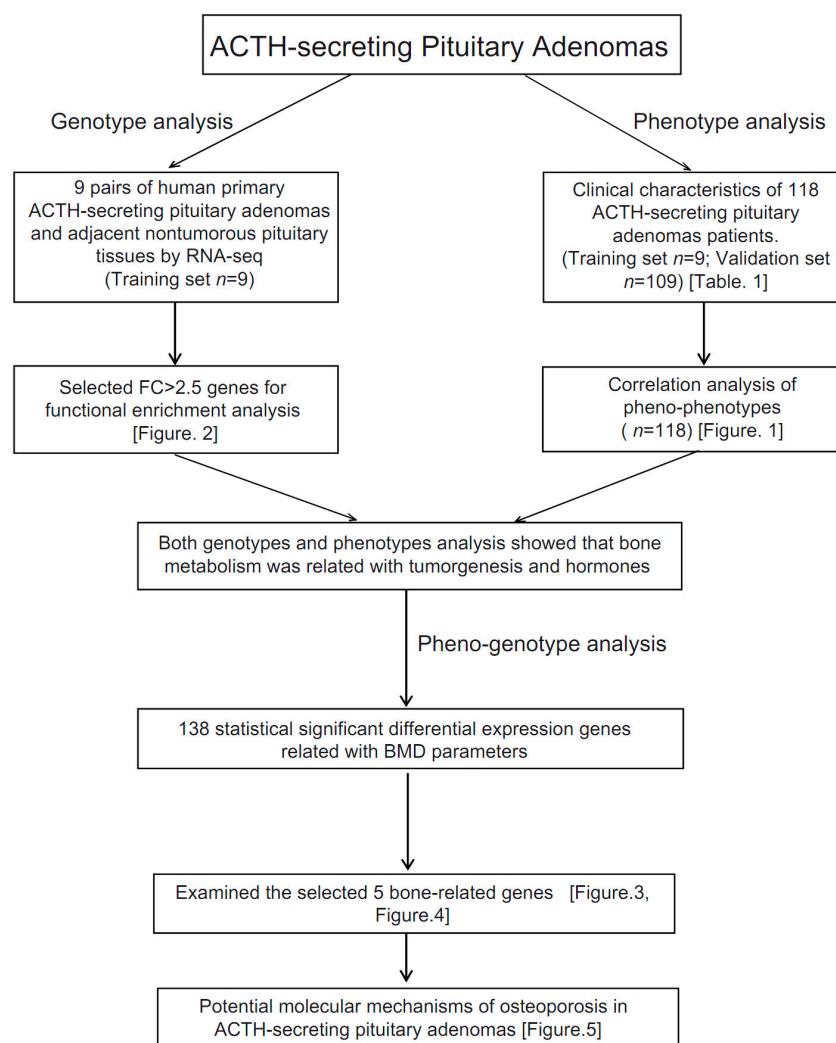

**Figure S1.** A framework of ACTH-secreting pituitary adenoma pheno-genotype analysis.

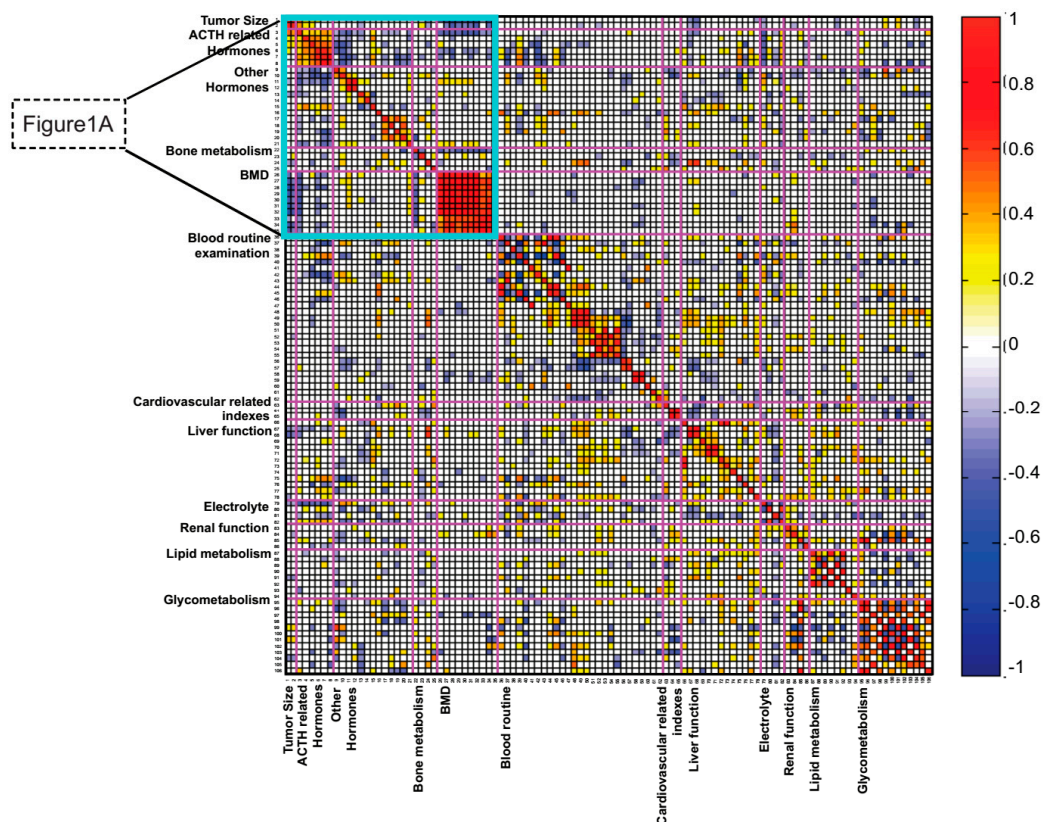

**Figure S2.** Spearman's rank correlation coefficient analysis of 106 clinical characteristics indices. A total of 106 clinical characteristics indices were processed for SRCC analysis. These phenotypes were shown in Table S1. The heat map of the SRCC results ( $p$  value  $< 0.05$ , FDR  $< 0.05$ ) was generated using Matlab 7.0 software. Warm colours represent positive correlations, and cold colours represent negative correlations. White indicates no association.

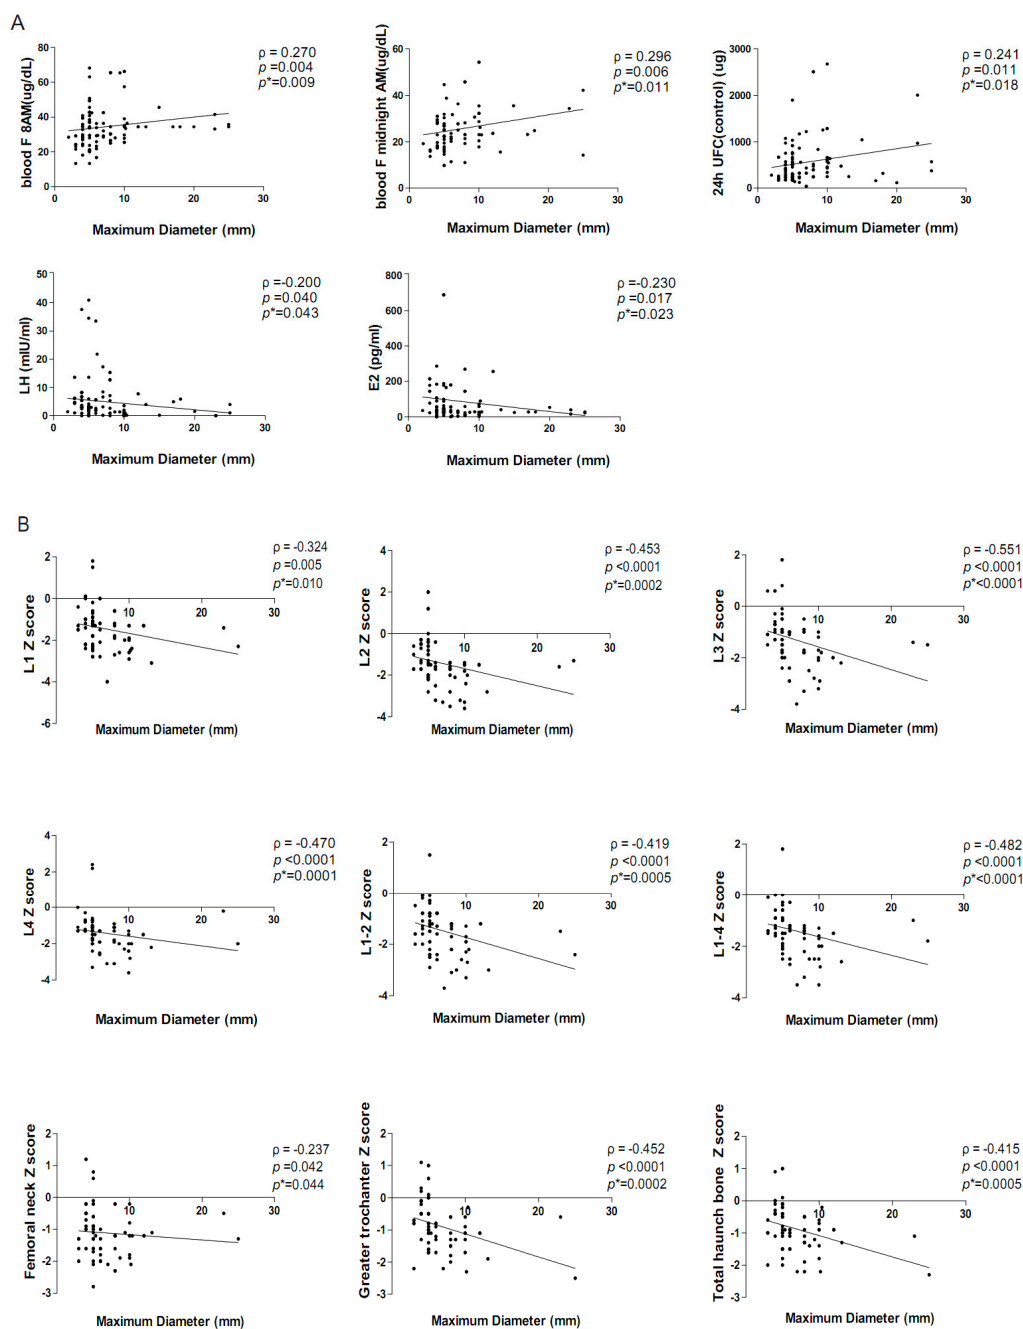

**Figure S3.** The maximum tumor diameter correlated with ACTH-secreting pituitary adenoma-related hormones, LH, E2 and age-matched bone mineral density (BMD) indices in ACTH-secreting pituitary adenomas. **(A)** The maximum tumor diameter was positively correlated with ACTH-secreting Pituitary Adenoma Related Hormones: 8 AM cortisol, midnight AM cortisol, 24 h UFC and was negatively correlated with LH and E2 levels; **(B)** The maximum tumor diameter negatively correlated with the age-matched BMD indices: L1, L2, L3, L4, L1-2, L1-4, the neck of the femur, the greater trochanter and the total haunch bone. Spearman's rank correlation analysis (Rho),  $p$  value and the Benjamini & Hochberg multiple testing correction ( $p^*$ ) were used to control for false discovery rate (FDR) and were provided in each graph.

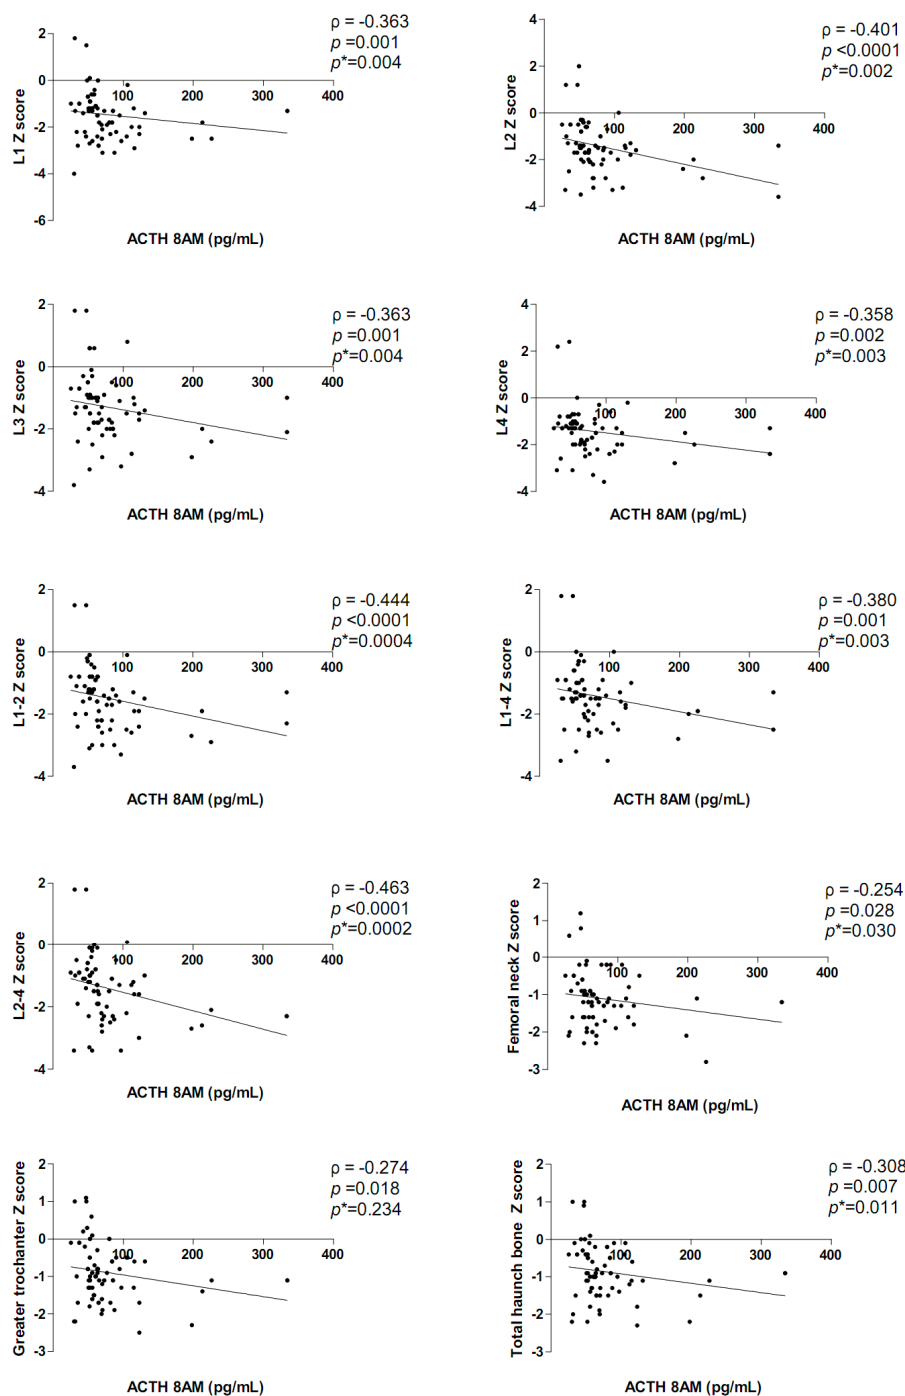

**Figure S4.** The 8 AM plasma ACTH Levels was inversely correlated with age-matched bone mineral density (BMD) indices in ACTH-secreting pituitary adenoma patients. The 8 AM plasma ACTH was negatively correlated with the age-matched BMD indices: L1, L2, L3, L4, L1-2, L1-4, L2-4, the neck of the femur, the greater trochanter and the total haunch bone. Spearman’s rank correlation analysis (Rho),  $p$  value and the Benjamini & Hochberg multiple testing correction ( $p^*$ ) were used to control for false discovery rate (FDR) and were provided in each graph.

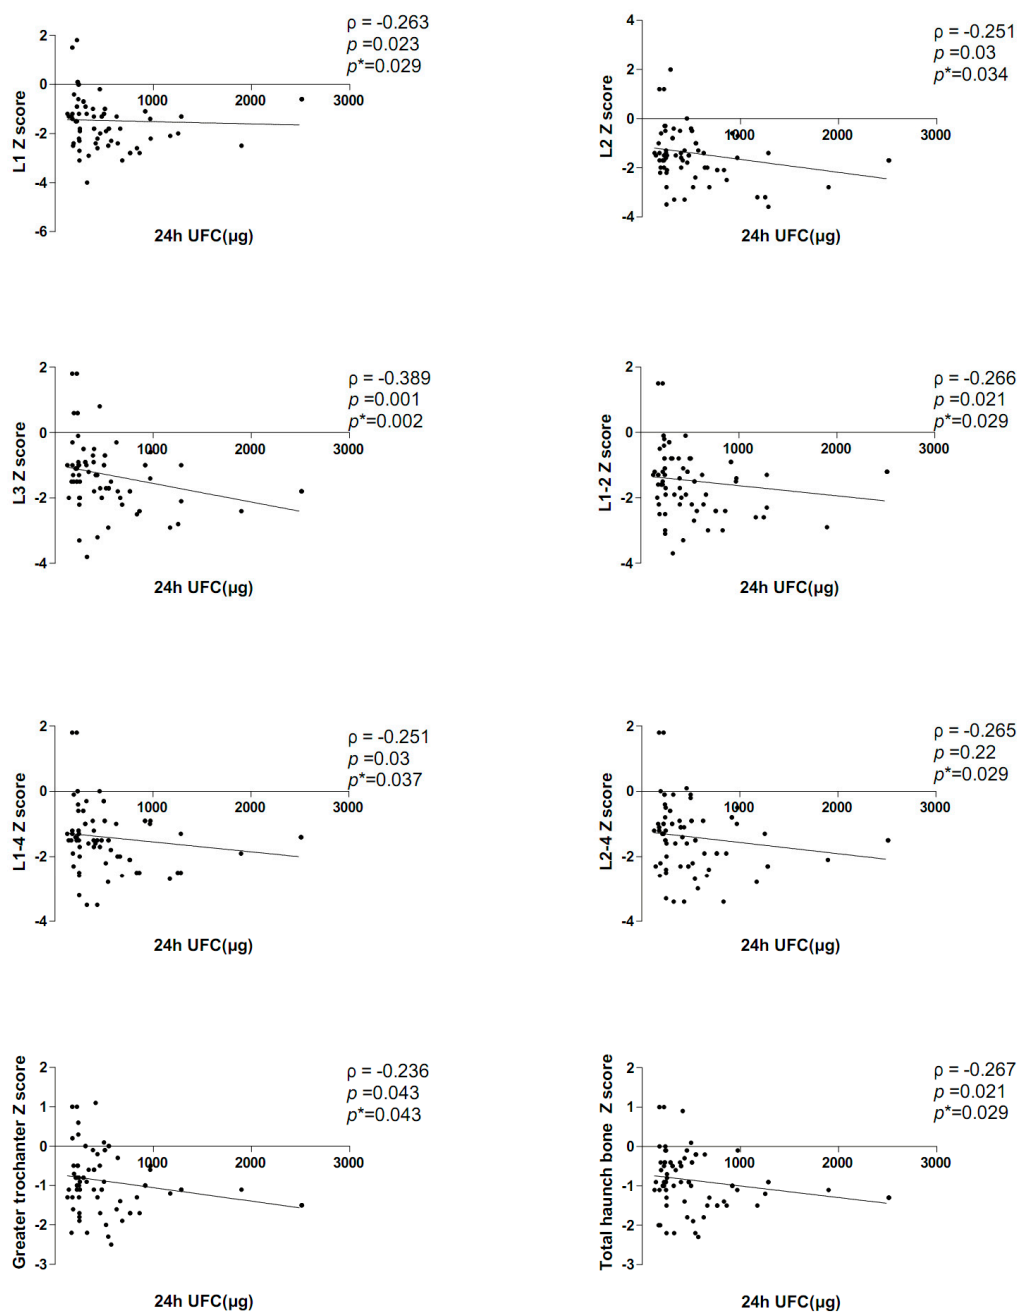

**Figure S5.** 24 h urinary-free cortisol level was inversely correlated with age-matched bone mineral density (BMD) indices in ACTH-secreting pituitary adenoma patients. The 24-h urinary-free cortisol level was correlated inversely with the age-matched BMD indices: L1, L2, L3, L1-2, L1-4, the greater trochanter and the total haunch bone. Spearman's rank correlation analysis (Rho), the  $p$  value and the Benjamini & Hochberg multiple testing correction ( $p^*$ ) were used to control for false discovery rate (FDR) and were provided in each graph.

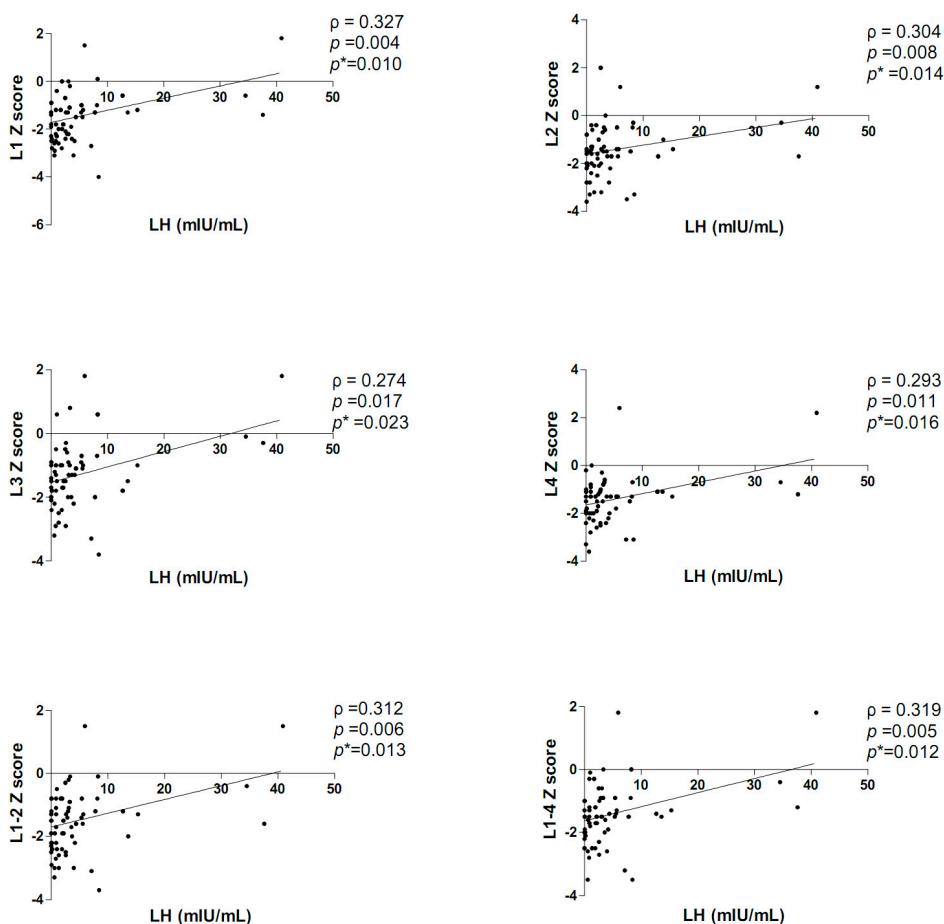

**Figure S6.** The LH level was positively correlated with age-matched bone mineral density (BMD) indices in ACTH-secreting pituitary adenoma patients. LH level was positively correlated with the age-matched BMD indices: L1, L2, L3, L4, L1-2 and L1-4. Spearman's rank correlation analysis (Rho), the  $p$  value and the Benjamini & Hochberg multiple testing correction ( $p^*$ ) were used to control for false discovery rate (FDR) and were provided in each graph.

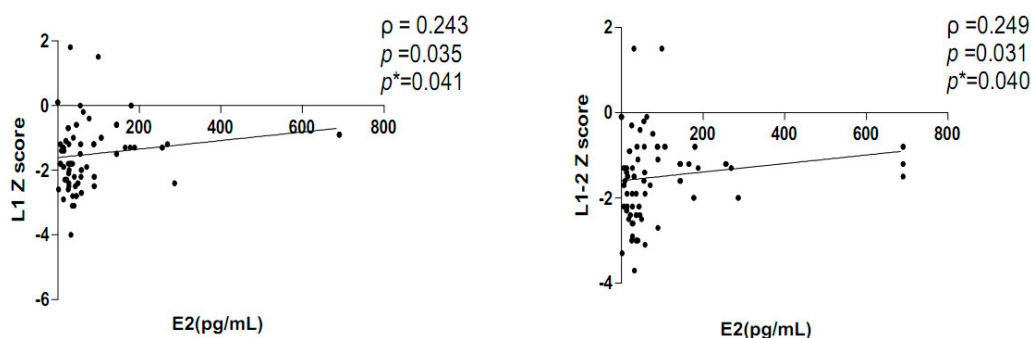

**Figure S7.** The estradiol level was positively correlated with the age-matched bone mineral density (BMD) indices in ACTH-secreting pituitary adenoma patients. Estradiol level was positively correlated with the age-matched BMD indices: L1 and L1-2. Spearman's rank correlation analysis (Rho), the  $p$  value and the Benjamini & Hochberg multiple testing correction ( $p^*$ ) were used to control for false discovery rate (FDR) and were provided in each graph.

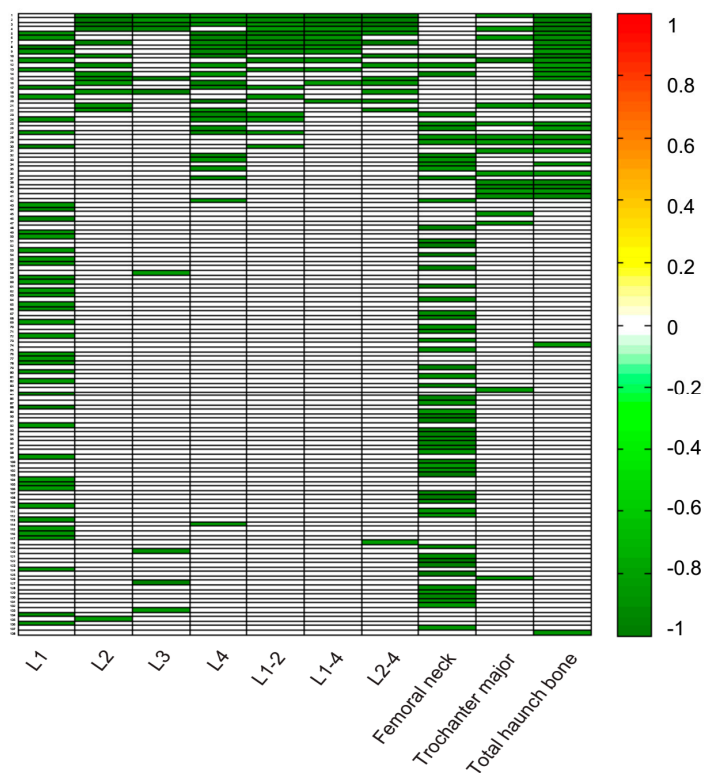

**Figure S8.** Spearman's Rank Correlation Coefficient (SRCC) analysis of age-matched bone mineral density (BMD) phenotypes and genotypes. The 10 clinical age-matched BMD phenotypes and 423 differentially expressed encoding genes in the ACTH-secreting pituitary adenomas were processed for SRCC analysis. There were 138 genes that were highly related with BMD indices (Tables S8 and S9). The heat map of the SRCC results ( $p$  value  $< 0.05$ , FDR  $< 0.05$ ) was generated using Matlab 7.0 software. Warm colours represent positive correlations, cold colours represent negative correlations and white indicates no association.



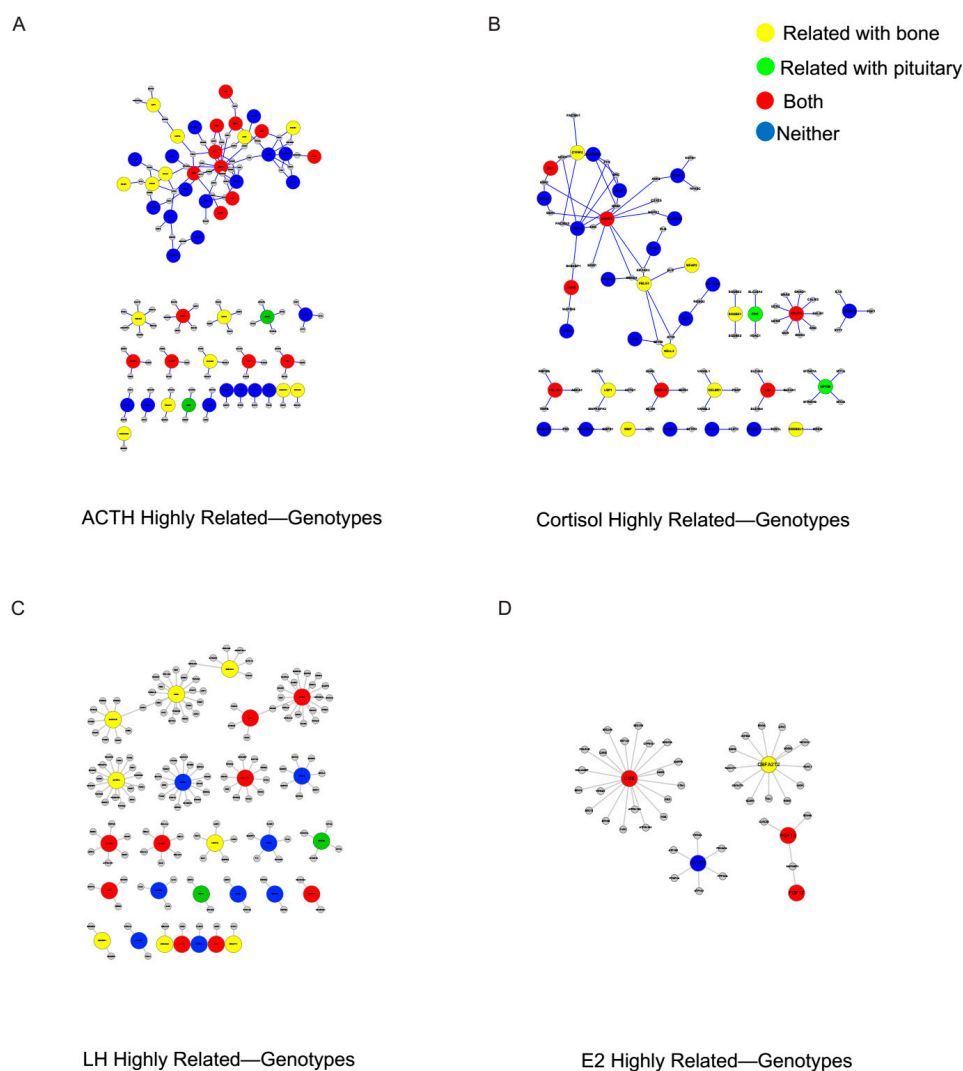

**Figure S9.** Gene expression profile of ACTH-related hormones in the PPI connection. Literature mining of the genes highly related to ACTH (A), genes highly related to cortisol (B), genes related to LH (C) and genes related to E2 (D) assessed for PPI connection. Red represents genes reported for bone and pituitary adenoma fields. Yellow and green represent genes reported for the bone or pituitary adenomas field, respectively. Blue represents genes not reported for bone or pituitary adenomas.



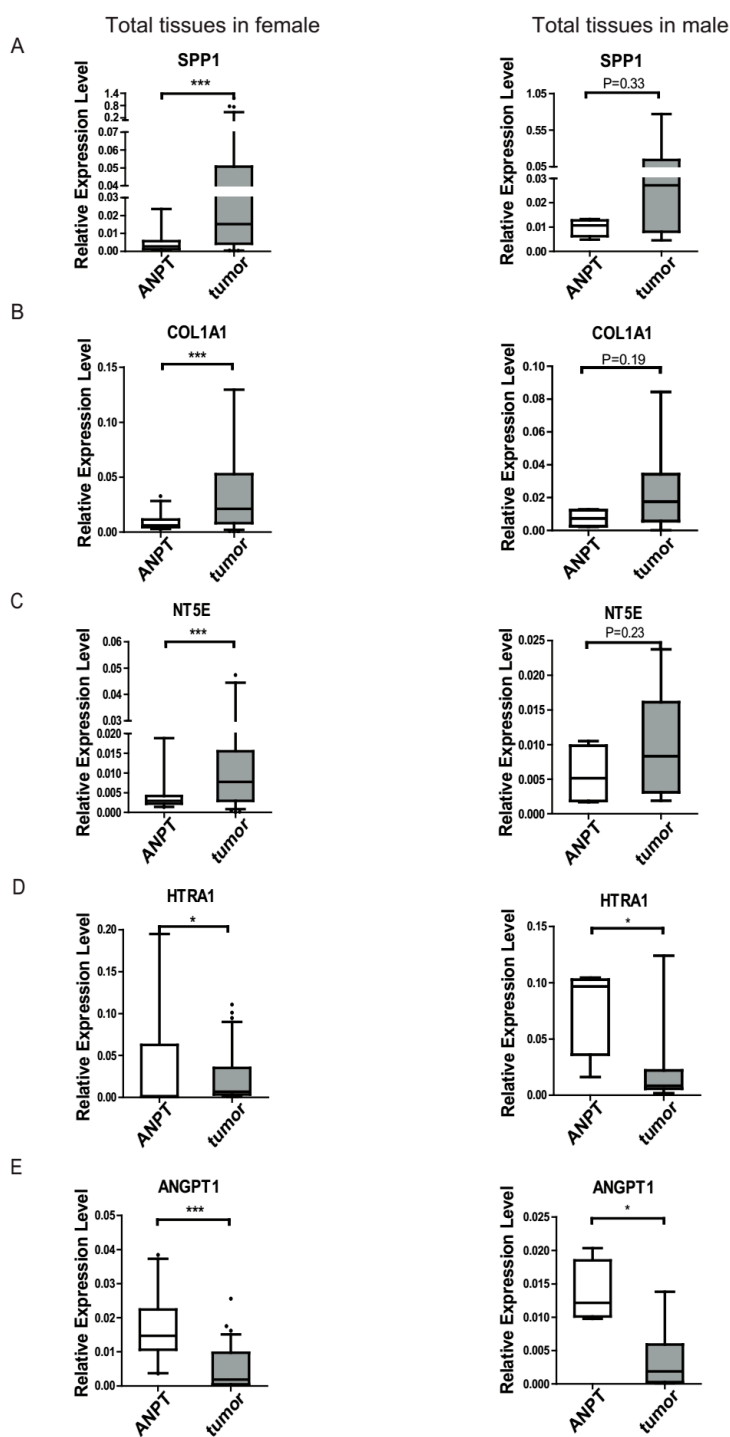

**Figure S10.** Signature profile of BMD Z score-related gene expression in ACTH-secreting pituitary adenomas. Comparison of expression levels of *SPP1* (A), *COL1A1* (B), *NT5E* (C), *HTRA1* (D) and *ANGPT1* (E) between ANPT and ACTH-secreting pituitary adenomas via qRT-PCR, including 92 female tissues (29 female paired tissues and 63 female unpaired tissues) and 17 male tissues (ANPT,  $n = 4$ ; tumor,  $n = 13$ ). The data are representative of three technical repeats with the median (quartiles). (Mann-Whitney test,  $p^* < 0.05$ ,  $p^{***} < 0.001$ . ANPT versus tumors).

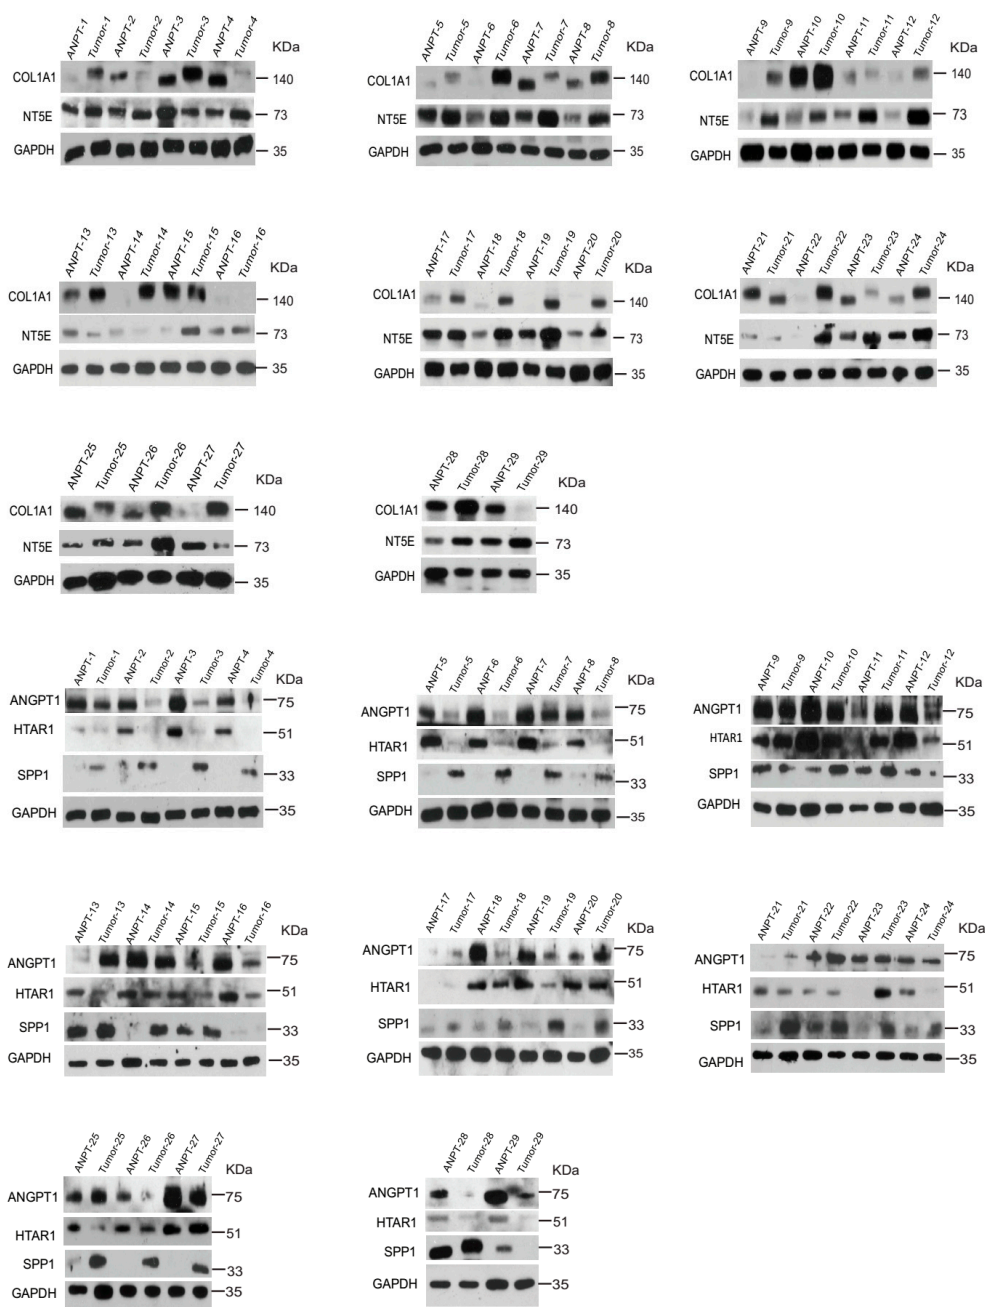

**Figure S11.** Full-length blots of Figure 4. Western blot assessed the expression levels of SPP1, COL1A1, NT5E, HTRA1 and ANGPT1 protein between 29 female pairs of ANPT and ACTH-secreting pituitary adenomas.

**Table S1.** Spearman results of pheno-phenotypes.

| ID                                                | Phenotypes               | 0.8-1 | 0.5-0.8 | (-0.5)-0.5 | (-0.8)-(-0.5) | (-1)-(-0.8) | Total |
|---------------------------------------------------|--------------------------|-------|---------|------------|---------------|-------------|-------|
| Tumor size                                        |                          |       |         |            |               |             |       |
| 1                                                 | Maximum diameter         | 2     | 1       | 22         | 2             | 0           | 27    |
| 2                                                 | Gross tumor volume       | 2     | 0       | 24         | 0             | 0           | 26    |
| ACTH-secreting pituitary adenoma related hormones |                          |       |         |            |               |             |       |
| 3                                                 | ACTH 8AM                 | 1     | 1       | 39         | 0             | 0           | 41    |
| 4                                                 | 8AM F                    | 1     | 0       | 23         | 0             | 0           | 24    |
| 5                                                 | 0AM F                    | 1     | 1       | 31         | 0             | 0           | 33    |
| 6                                                 | 24 h UFC (control)       | 1     | 2       | 38         | 0             | 0           | 41    |
| 7                                                 | 24 h UFC (low-dose DST)  | 1     | 3       | 37         | 0             | 0           | 41    |
| 8                                                 | 24 h UFC (high-dose DST) | 1     | 2       | 35         | 0             | 0           | 38    |
| Other pituitary related hormones                  |                          |       |         |            |               |             |       |
| 9                                                 | GH                       | 1     | 1       | 30         | 0             | 0           | 32    |
| 10                                                | IGF-1                    | 1     | 0       | 44         | 1             | 0           | 46    |
| 11                                                | LH                       | 1     | 1       | 31         | 0             | 0           | 33    |
| 12                                                | FSH                      | 1     | 1       | 14         | 0             | 0           | 16    |
| 13                                                | E2                       | 1     | 0       | 22         | 0             | 0           | 23    |
| 14                                                | PRL                      | 1     | 0       | 16         | 0             | 0           | 17    |
| 15                                                | TSTO                     | 1     | 0       | 33         | 0             | 0           | 34    |
| 16                                                | PROG                     | 1     | 1       | 29         | 0             | 0           | 31    |
| 17                                                | FT3                      | 1     | 1       | 29         | 0             | 0           | 31    |
| 18                                                | FT4                      | 1     | 1       | 23         | 0             | 0           | 25    |
| 19                                                | T3                       | 1     | 1       | 25         | 0             | 0           | 27    |
| 20                                                | T4                       | 1     | 1       | 20         | 0             | 0           | 22    |
| 21                                                | TSH                      | 1     | 0       | 25         | 0             | 0           | 26    |
| Bone metabolism                                   |                          |       |         |            |               |             |       |
| 22                                                | PTH                      | 1     | 0       | 17         | 0             | 0           | 18    |
| 23                                                | P                        | 1     | 0       | 25         | 0             | 0           | 26    |
| 24                                                | Ca                       | 1     | 3       | 28         | 0             | 0           | 32    |
| 25                                                | ALP                      | 1     | 0       | 25         | 0             | 0           | 26    |
| Age-matched bone mineral density (BMD)            |                          |       |         |            |               |             |       |
| 26                                                | L1                       | 3     | 4       | 19         | 0             | 0           | 26    |
| 27                                                | L2                       | 5     | 5       | 16         | 0             | 0           | 26    |
| 28                                                | L3                       | 4     | 6       | 11         | 1             | 0           | 22    |
| 29                                                | L4                       | 3     | 7       | 9          | 0             | 0           | 19    |
| 30                                                | L1-2                     | 5     | 5       | 14         | 0             | 0           | 24    |
| 31                                                | L1-4                     | 7     | 3       | 13         | 0             | 0           | 23    |
| 32                                                | L2-4                     | 6     | 4       | 7          | 1             | 0           | 18    |
| 33                                                | Neck of femur            | 1     | 8       | 9          | 0             | 0           | 18    |
| 34                                                | Greater trochanter       | 2     | 7       | 21         | 0             | 0           | 30    |
| 35                                                | Total haunch bone        | 1     | 7       | 11         | 0             | 0           | 19    |
| Routine blood chemistry                           |                          |       |         |            |               |             |       |
| 36                                                | WAC                      | 2     | 2       | 27         | 0             | 0           | 31    |
| 37                                                | LY%                      | 1     | 2       | 37         | 1             | 1           | 42    |
| 38                                                | MONO%                    | 0     | 0       | 16         | 0             | 0           | 16    |
| 39                                                | NEUT%                    | 1     | 1       | 41         | 3             | 1           | 47    |
| 40                                                | EOS                      | 2     | 0       | 31         | 2             | 0           | 35    |
| 41                                                | BASO                     | 1     | 0       | 12         | 0             | 0           | 13    |
| 42                                                | LUC                      | 1     | 1       | 28         | 2             | 0           | 32    |
| 43                                                | LY#                      | 1     | 1       | 33         | 1             | 0           | 36    |
| 44                                                | MONO#                    | 1     | 4       | 28         | 0             | 0           | 33    |
| 45                                                | NEUT#                    | 2     | 2       | 27         | 3             | 0           | 34    |
| 46                                                | EOS#                     | 2     | 0       | 29         | 0             | 0           | 31    |
| 47                                                | BASO#                    | 2     | 0       | 19         | 0             | 0           | 21    |
| 48                                                | RBC                      | 1     | 3       | 29         | 0             | 0           | 33    |
| 49                                                | HGB                      | 2     | 2       | 35         | 0             | 0           | 39    |
| 50                                                | HCT                      | 2     | 3       | 30         | 1             | 0           | 36    |
| 51                                                | MCV                      | 3     | 0       | 16         | 0             | 0           | 19    |
| 52                                                | MCHC                     | 2     | 1       | 28         | 0             | 0           | 31    |
| 53                                                | MCH                      | 3     | 1       | 20         | 0             | 0           | 24    |
| 54                                                | CHCM                     | 2     | 0       | 23         | 0             | 0           | 25    |
| 55                                                | CH                       | 3     | 0       | 16         | 0             | 0           | 19    |

Table S1. Cont.

| ID                             | Phenotypes       | 0.8-1 | 0.5-0.8 | (-0.5)-0.5 | (-0.8)-(-0.5) | (-1)-(-0.8) | Total |
|--------------------------------|------------------|-------|---------|------------|---------------|-------------|-------|
| 56                             | RDW-C            | 1     | 1       | 30         | 0             | 0           | 32    |
| 57                             | HDW              | 1     | 1       | 21         | 1             | 0           | 24    |
| 58                             | PLT              | 1     | 1       | 18         | 0             | 0           | 20    |
| 59                             | PCT              | 1     | 1       | 23         | 0             | 0           | 25    |
| 60                             | PDW              | 1     | 0       | 16         | 0             | 0           | 17    |
| 61                             | MPV              | 1     | 0       | 13         | 0             | 0           | 14    |
| 62                             | ESR              | 1     | 0       | 26         | 0             | 0           | 27    |
| Cardiovascular related indexes |                  |       |         |            |               |             |       |
| 63                             | hsCRP            | 1     | 0       | 31         | 0             | 0           | 32    |
| 64                             | SBP              | 1     | 1       | 22         | 0             | 0           | 24    |
| 65                             | DBP              | 1     | 1       | 24         | 0             | 0           | 26    |
| Liver function                 |                  |       |         |            |               |             |       |
| 66                             | ALT              | 1     | 2       | 25         | 0             | 0           | 28    |
| 67                             | TP               | 2     | 1       | 37         | 0             | 0           | 40    |
| 68                             | Alb              | 2     | 1       | 36         | 0             | 0           | 39    |
| 69                             | A/G              | 1     | 0       | 28         | 0             | 0           | 29    |
| 70                             | Tbil             | 2     | 0       | 29         | 0             | 0           | 31    |
| 71                             | Dbil             | 2     | 0       | 28         | 0             | 0           | 30    |
| 72                             | GGT              | 1     | 1       | 40         | 0             | 0           | 42    |
| 73                             | AST              | 1     | 1       | 16         | 0             | 0           | 18    |
| 74                             | TBA              | 1     | 0       | 19         | 0             | 0           | 20    |
| 75                             | LD               | 1     | 0       | 42         | 1             | 0           | 44    |
| 76                             | ChE              | 1     | 0       | 32         | 0             | 0           | 33    |
| 77                             | ADA              | 1     | 0       | 32         | 0             | 0           | 33    |
| 78                             | PA               | 1     | 0       | 40         | 0             | 0           | 41    |
| Electrolyte                    |                  |       |         |            |               |             |       |
| 79                             | K                | 1     | 0       | 37         | 0             | 0           | 38    |
| 80                             | Na               | 1     | 1       | 29         | 0             | 0           | 31    |
| 81                             | Cl               | 1     | 0       | 43         | 0             | 0           | 44    |
| 82                             | TCO <sub>2</sub> | 1     | 1       | 36         | 0             | 0           | 38    |
| Renal function                 |                  |       |         |            |               |             |       |
| 83                             | Cr(E)            | 1     | 0       | 20         | 0             | 0           | 21    |
| 84                             | Urea             | 1     | 0       | 30         | 2             | 0           | 33    |
| 85                             | Glu              | 3     | 4       | 40         | 0             | 0           | 47    |
| 86                             | UA               | 1     | 0       | 16         | 0             | 0           | 17    |
| Lipid metabolism               |                  |       |         |            |               |             |       |
| 87                             | TC               | 3     | 0       | 30         | 0             | 0           | 33    |
| 88                             | TG               | 1     | 1       | 24         | 0             | 0           | 26    |
| 89                             | HDL-C            | 2     | 0       | 29         | 0             | 0           | 31    |
| 90                             | LDL-C            | 3     | 0       | 17         | 0             | 0           | 20    |
| 91                             | ApoA1            | 2     | 0       | 20         | 0             | 0           | 22    |
| 92                             | ApoB             | 3     | 1       | 22         | 0             | 0           | 26    |
| 93                             | Lp(a)            | 1     | 0       | 15         | 0             | 0           | 16    |
| 94                             | FFA              | 1     | 0       | 27         | 0             | 0           | 28    |
| Glycometabolism                |                  |       |         |            |               |             |       |
| 95                             | blood glucose    | 2     | 3       | 40         | 0             | 0           | 45    |
| 96                             | GLU 0 min        | 2     | 5       | 17         | 0             | 0           | 24    |
| 97                             | INS 0 min        | 1     | 2       | 25         | 0             | 0           | 28    |
| 98                             | GLU 30 min       | 1     | 6       | 21         | 0             | 0           | 28    |
| 99                             | INS 30 min       | 1     | 3       | 28         | 1             | 0           | 33    |
| 100                            | GLU 60 min       | 1     | 5       | 27         | 0             | 0           | 33    |
| 101                            | INS 60 min       | 1     | 2       | 23         | 2             | 0           | 28    |
| 102                            | GLU 120 min      | 1     | 5       | 31         | 1             | 0           | 38    |
| 103                            | INS 120 min      | 1     | 4       | 21         | 0             | 0           | 26    |
| 104                            | GLU 180 min      | 1     | 3       | 25         | 0             | 0           | 29    |
| 105                            | INS 180 min      | 1     | 4       | 14         | 0             | 0           | 19    |
| 106                            | HbA1c            | 1     | 4       | 19         | 0             | 0           | 24    |

**Table S2.** Maximum diameter highly related-clinical indexes.

| Clinical Indexes   | <i>n</i> | Spearman | <i>p</i> Value | FDR    |
|--------------------|----------|----------|----------------|--------|
| Gross tumor volume | 110      | 0.941    | <0.001         | <0.001 |
| ACTH 8 AM          | 110      | 0.501    | <0.001         | <0.001 |
| 0 AM F             | 84       | 0.296    | 0.006          | 0.011  |
| 8 AM F             | 110      | 0.270    | 0.004          | 0.009  |
| 24 h UFC (control) | 110      | 0.241    | 0.011          | 0.018  |
| LH                 | 107      | -0.199   | 0.040          | 0.043  |
| Ca                 | 109      | -0.221   | 0.021          | 0.027  |
| E2                 | 107      | -0.230   | 0.017          | 0.023  |
| Neck of femur      | 75       | -0.237   | 0.042          | 0.044  |
| L1                 | 75       | -0.324   | 0.005          | 0.010  |
| Total haunch bone  | 75       | -0.415   | <0.001         | 0.001  |
| L1-2               | 75       | -0.419   | <0.001         | 0.001  |
| Greater trochanter | 75       | -0.452   | <0.001         | <0.001 |
| L2                 | 75       | -0.453   | <0.001         | <0.001 |
| L4                 | 75       | -0.470   | <0.001         | <0.001 |
| L1-4               | 75       | -0.482   | <0.001         | <0.001 |
| L3                 | 75       | -0.551   | <0.001         | <0.001 |
| L2-4               | 75       | -0.581   | <0.001         | <0.001 |

**Table S3.** ACTH 8AM highly related-osteo indexes.

| Osteo Indexes      | <i>n</i> | Spearman | <i>p</i> Value | FDR    |
|--------------------|----------|----------|----------------|--------|
| Neck of femur      | 75       | -0.254   | 0.028          | 0.030  |
| Greater trochanter | 75       | -0.274   | 0.018          | 0.023  |
| Total haunch bone  | 75       | -0.308   | 0.007          | 0.011  |
| L4                 | 75       | -0.358   | 0.002          | 0.003  |
| L1                 | 75       | -0.363   | 0.001          | 0.004  |
| L3                 | 75       | -0.363   | 0.001          | 0.004  |
| L1-4               | 75       | -0.379   | 0.001          | 0.003  |
| L2                 | 75       | -0.401   | <0.001         | 0.002  |
| L1-2               | 75       | -0.444   | <0.001         | <0.001 |
| L2-4               | 75       | -0.463   | <0.001         | <0.001 |

**Table S4.** 24 h UFC (control) highly related-osteo.

| Osteo Indexes      | <i>n</i> | Spearman | <i>p</i> Value | FDR   |
|--------------------|----------|----------|----------------|-------|
| Greater trochanter | 75       | -0.236   | 0.043          | 0.043 |
| L2                 | 75       | -0.251   | 0.030          | 0.034 |
| L1-4               | 75       | -0.251   | 0.030          | 0.037 |
| L1                 | 75       | -0.263   | 0.023          | 0.029 |
| L2-4               | 75       | -0.265   | 0.022          | 0.029 |
| L1-2               | 75       | -0.266   | 0.021          | 0.029 |
| Total haunch bone  | 75       | -0.267   | 0.021          | 0.029 |
| L3                 | 75       | -0.389   | 0.001          | 0.002 |

**Table S5.** LH highly related-osteo indexes.

| Osteo Indexes | <i>n</i> | Spearman | <i>p</i> Value | FDR    |
|---------------|----------|----------|----------------|--------|
| L1            | 75       | 0.327    | 0.004          | <0.001 |
| L1-4          | 75       | 0.319    | 0.005          | <0.001 |
| L1-2          | 75       | 0.312    | 0.006          | 0.001  |
| L2            | 75       | 0.304    | 0.008          | 0.010  |
| L4            | 75       | 0.293    | 0.011          | 0.011  |
| L3            | 75       | 0.274    | 0.017          | 0.013  |

**Table S6.** E2 highly related-osteo indexes.

| Osteo Indexes | <i>n</i> | Spearman | <i>p</i> Value | FDR   |
|---------------|----------|----------|----------------|-------|
| L1            | 75       | 0.243    | 0.035          | 0.041 |
| L1-2          | 75       | 0.249    | 0.031          | 0.040 |

**Table S7.** Information of sequencing quality control.

| ID | Tissue | Library Size (bp) | Strand Specific | Sequencing Type | Library Size (bp) | Read Length (nt) | Total Reads | Total Basepairs | Reads Mapped to Genome | Mapping Ratio |
|----|--------|-------------------|-----------------|-----------------|-------------------|------------------|-------------|-----------------|------------------------|---------------|
| N1 | tumor  | 300               | NO              | Pair-end        | 300               | 100              | 73,614,480  | 7,361,448,000   | 60,612,808             | 82.34%        |
|    | ANPTs  | 300               | NO              | Pair-end        | 300               | 100              | 78,173,560  | 7,817,356,000   | 62,375,857             | 79.79%        |
| N2 | tumor  | 300               | NO              | Pair-end        | 300               | 100              | 78,173,560  | 7,817,356,000   | 56,070,088             | 71.73%        |
|    | ANPTs  | 300               | NO              | Pair-end        | 300               | 100              | 89,010,912  | 8,901,091,200   | 73,630,521             | 82.72%        |
| N3 | tumor  | 300               | NO              | Pair-end        | 300               | 100              | 79,580,300  | 7,958,030,000   | 64,790,623             | 81.42%        |
|    | ANPTs  | 300               | NO              | Pair-end        | 300               | 100              | 76,619,924  | 7,661,992,400   | 64,033,275             | 83.57%        |
| N4 | tumor  | 300               | NO              | Pair-end        | 300               | 100              | 76,996,314  | 7,699,631,400   | 62,752,759             | 81.50%        |
|    | ANPTs  | 300               | NO              | Pair-end        | 300               | 100              | 90,919,768  | 9,091,976,800   | 46,035,736             | 50.63%        |
| N5 | tumor  | 300               | YES             | Pair-end        | 300               | 100              | 124,465,980 | 12,446,598,000  | 101,145,421            | 81.26%        |
|    | ANPTs  | 300               | YES             | Pair-end        | 300               | 100              | 64,252,872  | 6,425,287,200   | 52,554,201             | 81.79%        |
| N6 | tumor  | 300               | YES             | Pair-end        | 300               | 100              | 48,795,594  | 4,879,559,400   | 41,181,643             | 84.40%        |
|    | ANPTs  | 300               | YES             | Pair-end        | 300               | 100              | 47,704,480  | 4,770,448,000   | 40,219,630             | 84.31%        |
| N7 | tumor  | 300               | YES             | Pair-end        | 300               | 100              | 68,686,500  | 6,868,650,000   | 57,919,244             | 84.32%        |
|    | ANPTs  | 300               | YES             | Pair-end        | 300               | 100              | 75,849,422  | 7,584,942,200   | 63,327,495             | 83.49%        |
| N8 | tumor  | 300               | YES             | Pair-end        | 300               | 100              | 90,908,180  | 9,090,818,000   | 75,853,891             | 83.44%        |
|    | ANPTs  | 300               | YES             | Pair-end        | 300               | 100              | 87,935,006  | 8,793,500,600   | 53,538,621             | 60.88%        |
| N9 | tumor  | 300               | YES             | Pair-end        | 300               | 100              | 73,968,232  | 7,396,823,200   | 62,944,377             | 85.10%        |
|    | ANPTs  | 300               | YES             | Pair-end        | 300               | 100              | 78,229,188  | 7,822,918,800   | 63,552,258             | 81.24%        |

**Table S8.** Age-matched bone mineral density (BMD) highly related-genotypes.

| Gene            | Count of Highly Related BMD | FC   | L1   | L2   | L3   | L4   | L1-2 | L1-4 | L2-4 | Neck of Femur | Greater Trochanter | Total Haunch Bone |
|-----------------|-----------------------------|------|------|------|------|------|------|------|------|---------------|--------------------|-------------------|
| <i>COL1A1</i>   | 8                           | 3.01 | —    | 0.93 | 0.89 | 0.86 | 0.88 | 0.93 | 0.96 | —             | 0.82               | 0.91              |
| <i>RAB3B</i>    | 7                           | 4.79 | —    | 0.98 | 0.85 | 0.87 | 0.92 | 0.96 | 0.97 | —             | —                  | 0.97              |
| <i>INSR</i>     | 7                           | 3.36 | —    | 0.98 | 0.91 | 0.84 | 0.84 | 0.91 | 0.98 | —             | —                  | 0.89              |
| <i>RFX4</i>     | 7                           | 3.13 | —    | 0.94 | 0.92 | —    | 0.82 | 0.85 | 0.90 | —             | 0.82               | 0.98              |
| <i>LYPD1</i>    | 6                           | 3.32 | 0.87 | —    | —    | 0.97 | 0.92 | 0.89 | 0.83 | —             | —                  | 0.86              |
| <i>PITX1</i>    | 6                           | 2.88 | 0.85 | —    | —    | 0.92 | 0.90 | 0.87 | —    | —             | 0.82               | 0.90              |
| <i>CNGA4</i>    | 6                           | 2.57 | —    | 0.95 | —    | 0.93 | 0.89 | 0.94 | 0.97 | —             | —                  | 0.91              |
| <i>STK17B</i>   | 5                           | 3.46 | 0.98 | —    | —    | 0.85 | 0.91 | 0.84 | —    | —             | —                  | 0.82              |
| <i>NT5E</i>     | 5                           | 3.00 | 0.86 | —    | —    | 0.92 | 0.90 | 0.86 | —    | —             | —                  | 0.84              |
| <i>PPAPDC1A</i> | 5                           | 2.82 | —    | 0.86 | —    | 1.00 | —    | —    | 0.91 | 0.99          | —                  | 0.99              |
| <i>ACOT7</i>    | 5                           | 2.66 | 0.86 | —    | —    | —    | 0.89 | 0.86 | —    | —             | 0.95               | 0.90              |
| <i>GADD45B</i>  | 5                           | 2.60 | —    | 0.90 | —    | 0.86 | —    | —    | 0.87 | 0.86          | —                  | 0.83              |
| <i>ATP2B2</i>   | 4                           | 3.41 | 0.84 | —    | —    | —    | 0.87 | 0.81 | —    | —             | —                  | 0.81              |
| <i>BAMBI</i>    | 4                           | 3.08 | —    | 0.85 | —    | 0.84 | —    | —    | —    | 0.92          | —                  | 0.87              |
| <i>SIX2</i>     | 4                           | 2.79 | —    | 0.87 | 0.93 | —    | —    | —    | 0.82 | —             | —                  | 0.84              |
| <i>CYFIP2</i>   | 4                           | 2.69 | —    | 0.82 | —    | 0.96 | —    | 0.81 | 0.86 | —             | —                  | —                 |
| <i>MYH6</i>     | 3                           | 5.97 | 0.88 | —    | —    | 0.85 | 0.83 | —    | —    | —             | —                  | —                 |
| <i>KIAA1024</i> | 3                           | 5.94 | —    | 0.85 | 0.94 | —    | —    | —    | 0.85 | —             | —                  | —                 |
| <i>HFM1</i>     | 3                           | 4.70 | 0.84 | —    | —    | —    | 0.86 | —    | —    | —             | —                  | 0.89              |
| <i>RASEF</i>    | 3                           | 4.52 | —    | —    | —    | 0.94 | —    | 0.81 | 0.83 | —             | —                  | —                 |
| <i>ZBTB49</i>   | 3                           | 3.17 | —    | 0.86 | —    | —    | —    | —    | —    | —             | 0.84               | 0.90              |
| <i>C1orf95</i>  | 3                           | 2.97 | —    | 0.86 | —    | 0.83 | —    | —    | 0.90 | —             | —                  | —                 |
| <i>IGFBP3</i>   | 3                           | 2.78 | —    | —    | —    | 0.93 | 0.81 | —    | —    | 0.87          | —                  | —                 |
| <i>ATP6V1C2</i> | 3                           | 2.68 | 0.90 | —    | —    | 0.85 | 0.84 | —    | —    | —             | —                  | —                 |
| <i>PDE7A</i>    | 3                           | 2.68 | —    | —    | —    | —    | —    | —    | —    | 0.87          | 0.83               | 0.84              |
| <i>OLFM2</i>    | 3                           | 2.66 | —    | —    | —    | 0.89 | —    | —    | —    | 0.90          | —                  | 0.81              |
| <i>PITPNM2</i>  | 3                           | 2.59 | 0.83 | —    | —    | 0.88 | 0.81 | —    | —    | —             | —                  | —                 |
| <i>CHGA</i>     | 3                           | 2.57 | —    | —    | —    | —    | —    | —    | —    | 0.87          | 0.86               | 0.90              |
| <i>TCF7L2</i>   | 3                           | 2.53 | —    | —    | —    | —    | —    | —    | —    | 0.87          | 0.81               | 0.83              |
| <i>HIGD1B</i>   | 2                           | 6.64 | 0.93 | —    | —    | —    | 0.84 | —    | —    | —             | —                  | —                 |
| <i>FABP7</i>    | 2                           | 3.50 | —    | —    | —    | —    | —    | —    | —    | —             | 0.85               | 0.84              |
| <i>LHX3</i>     | 2                           | 3.45 | —    | —    | —    | 0.88 | —    | —    | —    | 0.87          | —                  | —                 |
| <i>COL11A2</i>  | 2                           | 3.23 | —    | —    | —    | 0.84 | —    | —    | —    | 0.87          | —                  | —                 |
| <i>PI16</i>     | 2                           | 3.10 | —    | —    | —    | —    | —    | —    | —    | 0.86          | —                  | 0.83              |



Table S8. Cont.

| Gene      | Count of Highly Related BMD | FC   | L1   | L2 | L3   | L4   | L1-2 | L1-4 | L2-4 | Neck of Femur | Greater Trochanter | Total Haunch Bone |
|-----------|-----------------------------|------|------|----|------|------|------|------|------|---------------|--------------------|-------------------|
| SOCS2     | 2                           | 3.00 | —    | —  | —    | 0.85 | —    | —    | —    | 0.83          | —                  | —                 |
| MYCL1     | 2                           | 2.99 | —    | —  | —    | —    | —    | —    | —    | —             | 0.83               | 0.83              |
| SLC38A3   | 2                           | 2.96 | —    | —  | —    | 0.85 | —    | —    | —    | 0.86          | —                  | —                 |
| SCD5      | 2                           | 2.93 | —    | —  | —    | —    | —    | —    | —    | —             | 0.88               | 0.91              |
| THBD      | 2                           | 2.88 | —    | —  | —    | —    | —    | —    | —    | —             | 0.90               | 0.89              |
| KIAA1211  | 2                           | 2.82 | —    | —  | —    | —    | —    | —    | —    | —             | 0.83               | 0.87              |
| PPARGC1A  | 2                           | 2.82 | —    | —  | —    | —    | —    | —    | —    | —             | 0.90               | 0.92              |
| PPIF      | 2                           | 2.58 | —    | —  | —    | 0.84 | —    | —    | —    | 0.87          | —                  | —                 |
| CRHR1     | 1                           | 7.47 | 0.83 | —  | —    | —    | —    | —    | —    | —             | —                  | —                 |
| CHRNE     | 1                           | 5.16 | 0.88 | —  | —    | —    | —    | —    | —    | —             | —                  | —                 |
| DPP6      | 1                           | 4.99 | —    | —  | —    | —    | —    | —    | —    | —             | 0.85               | —                 |
| TMEM100   | 1                           | 4.90 | 0.93 | —  | —    | —    | —    | —    | —    | —             | —                  | —                 |
| FOXL2     | 1                           | 4.79 | —    | —  | —    | —    | —    | —    | —    | —             | 0.82               | —                 |
| MSX1      | 1                           | 4.50 | —    | —  | —    | —    | —    | —    | —    | 0.94          | —                  | —                 |
| NELL2     | 1                           | 4.45 | 0.83 | —  | —    | —    | —    | —    | —    | —             | —                  | —                 |
| PTGDR2    | 1                           | 4.26 | 0.83 | —  | —    | —    | —    | —    | —    | —             | —                  | —                 |
| C14orf180 | 1                           | 4.20 | —    | —  | —    | —    | —    | —    | —    | 0.89          | —                  | —                 |
| GPR149    | 1                           | 4.17 | —    | —  | —    | —    | —    | —    | —    | 0.97          | —                  | —                 |
| MEIS2     | 1                           | 4.16 | 0.83 | —  | —    | —    | —    | —    | —    | —             | —                  | —                 |
| CACNG2    | 1                           | 4.11 | —    | —  | —    | —    | —    | —    | —    | 0.95          | —                  | —                 |
| GPC3      | 1                           | 4.11 | 0.83 | —  | —    | —    | —    | —    | —    | —             | —                  | —                 |
| HSD11B1   | 1                           | 4.00 | 0.83 | —  | —    | —    | —    | —    | —    | —             | —                  | —                 |
| NTNG1     | 1                           | 3.92 | —    | —  | —    | —    | —    | —    | —    | 0.96          | —                  | —                 |
| TRIM2     | 1                           | 3.77 | —    | —  | 0.82 | —    | —    | —    | —    | —             | —                  | —                 |
| GNAL      | 1                           | 3.77 | 0.82 | —  | —    | —    | —    | —    | —    | —             | —                  | —                 |
| TLE3      | 1                           | 3.75 | 0.83 | —  | —    | —    | —    | —    | —    | —             | —                  | —                 |
| ALDH1A2   | 1                           | 3.74 | —    | —  | —    | —    | —    | —    | —    | 0.92          | —                  | —                 |
| MYT1L     | 1                           | 3.74 | 0.82 | —  | —    | —    | —    | —    | —    | —             | —                  | —                 |
| SALL1     | 1                           | 3.73 | 0.83 | —  | —    | —    | —    | —    | —    | —             | —                  | —                 |
| FMOD      | 1                           | 3.71 | —    | —  | —    | —    | —    | —    | —    | 0.90          | —                  | —                 |
| S100A13   | 1                           | 3.69 | 0.83 | —  | —    | —    | —    | —    | —    | —             | —                  | —                 |
| RSPO3     | 1                           | 3.61 | 0.85 | —  | —    | —    | —    | —    | —    | —             | —                  | —                 |
| TSPAN12   | 1                           | 3.54 | —    | —  | —    | —    | —    | —    | —    | 0.89          | —                  | —                 |
| TSPAN8    | 1                           | 3.52 | —    | —  | —    | —    | —    | —    | —    | 0.88          | —                  | —                 |

Table S8. Cont.

| Gene     | Count of Highly Related BMD | FC   | L1   | L2 | L3 | L4 | L1-2 | L1-4 | L2-4 | Neck of Femur | Greater Trochanter | Total Haunch Bone |
|----------|-----------------------------|------|------|----|----|----|------|------|------|---------------|--------------------|-------------------|
| SCGN     | 1                           | 3.46 | 0.82 | —  | —  | —  | —    | —    | —    | —             | —                  | —                 |
| S100A1   | 1                           | 3.42 | —    | —  | —  | —  | —    | —    | —    | 0.85          | —                  | —                 |
| KCNH8    | 1                           | 3.39 | —    | —  | —  | —  | —    | —    | —    | 0.87          | —                  | —                 |
| PLEKHG5  | 1                           | 3.37 | 0.83 | —  | —  | —  | —    | —    | —    | —             | —                  | —                 |
| ARMC4    | 1                           | 3.36 | —    | —  | —  | —  | —    | —    | —    | 0.82          | —                  | —                 |
| HTRA1    | 1                           | 3.35 | —    | —  | —  | —  | —    | —    | —    | —             | —                  | 0.82              |
| PLCD3    | 1                           | 3.33 | —    | —  | —  | —  | —    | —    | —    | 0.87          | —                  | —                 |
| FAM163A  | 1                           | 3.28 | 0.81 | —  | —  | —  | —    | —    | —    | —             | —                  | —                 |
| PPP1R13L | 1                           | 3.26 | 0.83 | —  | —  | —  | —    | —    | —    | —             | —                  | —                 |
| ANGPT1   | 1                           | 3.25 | 0.83 | —  | —  | —  | —    | —    | —    | —             | —                  | —                 |
| VSTM1    | 1                           | 3.25 | —    | —  | —  | —  | —    | —    | —    | 0.96          | —                  | —                 |
| GNRHR    | 1                           | 3.21 | 0.83 | —  | —  | —  | —    | —    | —    | —             | —                  | —                 |
| ZNF521   | 1                           | 3.20 | —    | —  | —  | —  | —    | —    | —    | 0.85          | —                  | —                 |
| PITX2    | 1                           | 3.11 | 0.83 | —  | —  | —  | —    | —    | —    | —             | —                  | —                 |
| SLC16A2  | 1                           | 3.10 | —    | —  | —  | —  | —    | —    | —    | 0.93          | —                  | —                 |
| ESR1     | 1                           | 3.09 | —    | —  | —  | —  | —    | —    | —    | —             | 0.82               | —                 |
| USH1C    | 1                           | 3.08 | 0.82 | —  | —  | —  | —    | —    | —    | —             | —                  | —                 |
| IGFBP5   | 1                           | 3.08 | —    | —  | —  | —  | —    | —    | —    | 0.91          | —                  | —                 |
| PCP4     | 1                           | 3.07 | —    | —  | —  | —  | —    | —    | —    | 0.85          | —                  | —                 |
| ATG9B    | 1                           | 3.06 | 0.91 | —  | —  | —  | —    | —    | —    | —             | —                  | —                 |
| SCN1B    | 1                           | 3.06 | —    | —  | —  | —  | —    | —    | —    | 0.82          | —                  | —                 |
| DHRS3    | 1                           | 3.05 | —    | —  | —  | —  | —    | —    | —    | 0.95          | —                  | —                 |
| CPVL     | 1                           | 3.03 | —    | —  | —  | —  | —    | —    | —    | 0.91          | —                  | —                 |
| COL4A6   | 1                           | 3.01 | 0.83 | —  | —  | —  | —    | —    | —    | —             | —                  | —                 |
| MATN2    | 1                           | 3.00 | —    | —  | —  | —  | —    | —    | —    | 0.96          | —                  | —                 |
| LGR5     | 1                           | 2.98 | —    | —  | —  | —  | —    | —    | —    | 0.95          | —                  | —                 |
| F3       | 1                           | 2.97 | —    | —  | —  | —  | —    | —    | —    | 0.86          | —                  | —                 |
| APOL4    | 1                           | 2.97 | —    | —  | —  | —  | —    | —    | —    | 0.92          | —                  | —                 |
| RNASE1   | 1                           | 2.95 | —    | —  | —  | —  | —    | —    | —    | 0.88          | —                  | —                 |
| C19orf33 | 1                           | 2.95 | —    | —  | —  | —  | —    | —    | —    | 0.84          | —                  | —                 |
| NEUROD4  | 1                           | 2.95 | 0.83 | —  | —  | —  | —    | —    | —    | —             | —                  | —                 |
| GPX3     | 1                           | 2.94 | —    | —  | —  | —  | —    | —    | —    | 0.91          | —                  | —                 |
| C7       | 1                           | 2.92 | —    | —  | —  | —  | —    | —    | —    | 0.82          | —                  | —                 |
| CPNE4    | 1                           | 2.88 | —    | —  | —  | —  | —    | —    | —    | 0.84          | —                  | —                 |

Table S8. Cont.

| Gene     | Count of Highly Related BMD | FC   | L1   | L2   | L3   | L4   | L1-2 | L1-4 | L2-4 | Neck of Femur | Greater Trochanter | Total Haunch Bone |
|----------|-----------------------------|------|------|------|------|------|------|------|------|---------------|--------------------|-------------------|
| PHGDH    | 1                           | 2.88 | —    | —    | —    | —    | —    | —    | —    | 0.98          | —                  | —                 |
| AMPD3    | 1                           | 2.86 | 0.83 | —    | —    | —    | —    | —    | —    | —             | —                  | —                 |
| PLTP     | 1                           | 2.86 | 0.82 | —    | —    | —    | —    | —    | —    | —             | —                  | —                 |
| SPP1     | 1                           | 2.86 | 0.83 | —    | —    | —    | —    | —    | —    | —             | —                  | —                 |
| PKD1L1   | 1                           | 2.85 | —    | —    | —    | —    | —    | —    | —    | 0.90          | —                  | —                 |
| AMOT     | 1                           | 2.85 | —    | —    | —    | —    | —    | —    | —    | 0.98          | —                  | —                 |
| CYS1     | 1                           | 2.83 | —    | —    | —    | —    | —    | —    | —    | 0.86          | —                  | —                 |
| C17orf72 | 1                           | 2.83 | 0.83 | —    | —    | —    | —    | —    | —    | —             | —                  | —                 |
| AGR3     | 1                           | 2.83 | —    | —    | —    | —    | —    | —    | —    | 0.87          | —                  | —                 |
| FLRT1    | 1                           | 2.83 | —    | —    | —    | —    | —    | —    | —    | 0.84          | —                  | —                 |
| ZNF516   | 1                           | 2.81 | 0.84 | —    | —    | —    | —    | —    | —    | —             | —                  | —                 |
| UCK2     | 1                           | 2.81 | —    | —    | —    | 0.83 | —    | —    | —    | —             | —                  | —                 |
| IGSF1    | 1                           | 2.80 | 0.83 | —    | —    | —    | —    | —    | —    | —             | —                  | —                 |
| FZD7     | 1                           | 2.79 | 0.87 | —    | —    | —    | —    | —    | —    | —             | —                  | —                 |
| FGF1     | 1                           | 2.77 | 0.83 | —    | —    | —    | —    | —    | —    | —             | —                  | —                 |
| MFAP2    | 1                           | 2.77 | —    | —    | —    | —    | —    | —    | 0.82 | —             | —                  | —                 |
| GDPD2    | 1                           | 2.75 | —    | —    | —    | —    | —    | —    | —    | 0.85          | —                  | —                 |
| SYNE2    | 1                           | 2.70 | —    | —    | 0.89 | —    | —    | —    | —    | —             | —                  | —                 |
| ADAM28   | 1                           | 2.70 | —    | —    | —    | —    | —    | —    | —    | 0.88          | —                  | —                 |
| EXOC3L2  | 1                           | 2.68 | —    | —    | —    | —    | —    | —    | —    | 0.97          | —                  | —                 |
| NTRK2    | 1                           | 2.66 | —    | —    | —    | —    | —    | —    | —    | 0.94          | —                  | —                 |
| EPHX1    | 1                           | 2.66 | 0.82 | —    | —    | —    | —    | —    | —    | —             | —                  | —                 |
| FBXO31   | 1                           | 2.64 | —    | —    | —    | —    | —    | —    | —    | 0.98          | —                  | —                 |
| CDH20    | 1                           | 2.64 | —    | —    | —    | —    | —    | —    | —    | —             | 0.81               | —                 |
| RAB40C   | 1                           | 2.64 | —    | —    | 0.94 | —    | —    | —    | —    | —             | —                  | —                 |
| NFIX     | 1                           | 2.63 | —    | —    | —    | —    | —    | —    | —    | 0.89          | —                  | —                 |
| KIAA1462 | 1                           | 2.63 | —    | —    | —    | —    | —    | —    | —    | 0.83          | —                  | —                 |
| OXT      | 1                           | 2.61 | —    | —    | —    | —    | —    | —    | —    | 0.91          | —                  | —                 |
| CDH22    | 1                           | 2.60 | —    | —    | —    | —    | —    | —    | —    | 0.85          | —                  | —                 |
| SYT12    | 1                           | 2.60 | —    | —    | —    | —    | —    | —    | —    | 0.84          | —                  | —                 |
| PRRG4    | 1                           | 2.56 | —    | —    | 0.84 | —    | —    | —    | —    | —             | —                  | —                 |
| TIMP4    | 1                           | 2.55 | 0.84 | —    | —    | —    | —    | —    | —    | —             | —                  | —                 |
| ADCY2    | 1                           | 2.54 | —    | 0.83 | —    | —    | —    | —    | —    | —             | —                  | —                 |
| GALNT14  | 1                           | 2.53 | 0.83 | —    | —    | —    | —    | —    | —    | —             | —                  | —                 |
| CCL14    | 1                           | 2.51 | —    | —    | —    | —    | —    | —    | —    | 0.87          | —                  | —                 |
| FILIP1   | 1                           | 2.51 | —    | —    | —    | —    | —    | —    | —    | —             | —                  | 0.85              |

—: p value > 0.05.

Table S9. Osteo-related genes.

| ID           | N1     |        | N2     |        | N3     |        | N4     |        | N5     |        | N6     |        | N7     |        | N8     |        | N9     |        | Differential Recurrence | DI     | Avg (Tumor) | Avg (ANPTs) | Gene Symbol | Chr   | FC   |
|--------------|--------|--------|--------|--------|--------|--------|--------|--------|--------|--------|--------|--------|--------|--------|--------|--------|--------|--------|-------------------------|--------|-------------|-------------|-------------|-------|------|
|              | Tumor  | ANPTs  | Tumor  | ANPTs  | Tumor  | ANPTs  | Tumor  | ANPTs  | Tumor  | ANPTs  | Tumor  | ANPTs  | Tumor  | ANPTs  | Tumor  | ANPTs  | Tumor  | ANPTs  |                         |        |             |             |             |       |      |
| NM_000088    | 40.10  | 5.07   | 43.31  | 9.33   | 77.52  | 7.59   | 5.41   | 7.36   | 16.26  | 6.24   | 21.30  | 3.31   | 12.44  | 3.88   | 24.57  | 4.79   | 24.26  | 5.71   | 8                       | 0.668  | 29.4626     | 5.92063     | COL1A1      | chr17 | 3.01 |
| NM_002867    | 78.90  | 2.25   | 68.27  | 2.84   | 54.60  | 3.54   | 2.25   | 3.76   | 33.42  | 1.99   | 55.90  | 1.62   | 16.51  | 1.43   | 35.83  | 1.39   | 42.35  | 5.40   | 8                       | 0.791  | 43.1134     | 2.69056     | RAB3B       | chr1  | 4.79 |
| NM_001079817 | 88.35  | 9.62   | 53.97  | 9.41   | 94.81  | 10.07  | 7.92   | 8.51   | 19.79  | 6.86   | 38.24  | 5.50   | 10.85  | 4.89   | 34.87  | 5.96   | 73.20  | 12.84  | 8                       | 0.703  | 46.8891     | 8.18416     | INSR        | chr19 | 3.36 |
| NM_213594    | 0.27   | 6.65   | 0.30   | 4.41   | 0.36   | 5.74   | 3.71   | 2.80   | 1.05   | 3.80   | 0.00   | 4.76   | 4.91   | 3.03   | 0.28   | 5.56   | 0.00   | 6.03   | 7                       | -0.680 | 1.20784     | 4.75336     | RFX4        | chr12 | 3.13 |
| NM_001077427 | 1.71   | 24.28  | 2.00   | 16.03  | 1.94   | 19.78  | 11.34  | 18.63  | 23.78  | 58.97  | 1.51   | 30.08  | 33.97  | 41.80  | 19.45  | 36.92  | 0.58   | 39.67  | 6                       | -0.699 | 10.6968     | 31.7958     | LYPD1       | chr2  | 3.32 |
| NM_002653    | 21.85  | 143.56 | 32.03  | 158.57 | 22.98  | 111.75 | 101.51 | 113.15 | 49.20  | 100.13 | 7.88   | 79.51  | 47.24  | 80.58  | 25.41  | 81.52  | 9.77   | 53.11  | 7                       | -0.652 | 35.3185     | 102.432     | PITX1       | chr5  | 2.88 |
| NM_001037329 | 7.27   | 0.39   | 3.94   | 0.39   | 4.95   | 0.19   | 0.39   | 0.41   | 0.26   | 0.47   | 2.52   | 0.16   | 0.32   | 0.44   | 9.48   | 1.29   | 1.66   | 0.17   | 6                       | 0.612  | 3.42163     | 0.436548    | CNGA4       | chr11 | 2.57 |
| NM_004226    | 9.69   | 1.58   | 7.61   | 2.07   | 18.04  | 1.64   | 1.77   | 2.16   | 7.63   | 2.11   | 13.05  | 1.57   | 6.68   | 1.63   | 6.17   | 1.71   | 26.00  | 3.98   | 8                       | 0.711  | 10.7378     | 2.05126     | STK17B      | chr2  | 3.46 |
| NM_002526    | 15.62  | 1.62   | 18.26  | 2.64   | 13.47  | 1.33   | 3.39   | 1.73   | 8.57   | 2.10   | 31.88  | 2.07   | 3.84   | 5.18   | 4.71   | 1.69   | 17.51  | 3.64   | 7                       | 0.667  | 13.0272     | 2.44483     | NT5E        | chr6  | 3.00 |
| NM_001030059 | 12.02  | 0.00   | 7.35   | 0.08   | 6.05   | 0.44   | 0.05   | 0.04   | 1.21   | 0.05   | 0.48   | 0.00   | 1.70   | 0.09   | 0.08   | 0.00   | 6.82   | 0.07   | 8                       | 0.646  | 3.97368     | 0.0855755   | PPAPDC1A    | chr10 | 2.82 |
| NM_181864    | 0.84   | 6.64   | 1.02   | 2.80   | 0.41   | 3.78   | 2.36   | 2.82   | 3.89   | 4.71   | 0.29   | 2.60   | 0.55   | 2.25   | 0.69   | 3.52   | 1.17   | 5.07   | 7                       | -0.624 | 1.24907     | 3.80045     | ACOT7       | chr1  | 2.66 |
| NM_015675    | 198.82 | 34.59  | 169.21 | 30.85  | 131.76 | 32.65  | 23.16  | 25.69  | 138.46 | 70.46  | 133.77 | 23.91  | 45.20  | 27.65  | 184.90 | 47.83  | 557.12 | 110.95 | 6                       | 0.616  | 175.822     | 44.9527     | GADD45B     | chr19 | 2.60 |
| NM_001001331 | 9.80   | 1.39   | 10.98  | 2.10   | 10.23  | 1.83   | 1.27   | 1.48   | 7.81   | 1.25   | 6.86   | 0.66   | 5.23   | 2.17   | 12.62  | 2.41   | 9.43   | 2.53   | 8                       | 0.706  | 8.24858     | 1.7587      | ATP2B2      | chr3  | 3.41 |
| NM_012342    | 1.52   | 18.37  | 0.92   | 11.82  | 0.44   | 6.96   | 6.91   | 6.29   | 3.28   | 6.33   | 0.48   | 7.67   | 2.20   | 2.59   | 0.70   | 6.25   | 0.04   | 4.55   | 6                       | -0.675 | 1.83169     | 7.8706      | BAMBI       | chr10 | 3.08 |
| NM_016932    | 3.47   | 29.58  | 2.72   | 11.29  | 2.20   | 26.19  | 38.42  | 32.44  | 9.62   | 25.34  | 1.12   | 7.35   | 4.39   | 6.23   | 1.27   | 10.81  | 1.38   | 5.13   | 7                       | -0.642 | 7.1763      | 17.1509     | SIX2        | chr2  | 2.79 |
| NM_001037332 | 18.28  | 4.45   | 23.61  | 3.90   | 17.16  | 3.47   | 4.67   | 5.18   | 5.97   | 2.52   | 32.45  | 1.34   | 10.38  | 3.42   | 18.65  | 3.03   | 15.00  | 3.43   | 8                       | 0.689  | 16.2413     | 3.41592     | CYFIP2      | chr5  | 3.22 |
| NM_002471    | 49.39  | 0.60   | 50.54  | 0.84   | 157.14 | 5.49   | 4.81   | 0.77   | 179.89 | 5.40   | 268.46 | 1.39   | 29.61  | 2.19   | 7.48   | 2.12   | 138.85 | 7.02   | 8                       | 0.833  | 98.0186     | 2.86987     | MYH6        | chr14 | 5.97 |
| NM_015206    | 13.75  | 0.35   | 6.13   | 0.32   | 15.69  | 0.40   | 0.18   | 0.32   | 8.20   | 0.60   | 5.12   | 0.32   | 3.30   | 0.52   | 9.14   | 0.40   | 12.08  | 0.90   | 8                       | 0.832  | 8.17541     | 0.45839     | KIAA1024    | chr15 | 5.94 |
| NM_001017975 | 15.89  | 0.92   | 10.66  | 0.89   | 17.65  | 0.89   | 0.73   | 0.75   | 17.69  | 1.56   | 42.83  | 1.23   | 4.30   | 1.88   | 13.73  | 0.87   | 26.54  | 2.74   | 8                       | 0.787  | 16.6687     | 1.30376     | HFM1        | chr1  | 4.70 |
| NM_152573    | 23.53  | 1.49   | 15.81  | 1.36   | 14.93  | 1.62   | 1.21   | 1.87   | 23.55  | 4.60   | 23.17  | 1.65   | 27.75  | 3.07   | 12.04  | 1.61   | 77.62  | 17.12  | 8                       | 0.779  | 24.4024     | 3.82164     | RASEF       | chr9  | 4.52 |
| NM_145291    | 52.97  | 4.42   | 57.15  | 5.20   | 96.54  | 5.63   | 2.14   | 3.33   | 9.49   | 5.04   | 32.52  | 2.32   | 9.07   | 3.83   | 38.92  | 3.33   | 86.81  | 11.75  | 7                       | 0.685  | 42.8454     | 4.98444     | ZBTB49      | chr4  | 3.17 |
| NM_001003665 | 0.55   | 4.60   | 1.01   | 5.35   | 1.23   | 6.07   | 4.63   | 4.59   | 0.99   | 2.73   | 0.58   | 2.60   | 2.07   | 3.69   | 1.26   | 3.76   | 0.12   | 3.82   | 7                       | -0.664 | 1.38323     | 4.13486     | C1orf95     | chr1  | 2.97 |
| NM_000598    | 11.78  | 122.91 | 10.50  | 107.23 | 4.65   | 44.56  | 79.69  | 70.19  | 95.49  | 243.65 | 17.44  | 291.84 | 77.73  | 90.03  | 84.99  | 208.53 | 21.12  | 222.18 | 7                       | -0.641 | 44.8201     | 155.679     | IGFBP3      | chr7  | 2.78 |
| NM_144583    | 31.05  | 2.67   | 18.26  | 2.55   | 50.70  | 3.55   | 1.99   | 2.25   | 11.61  | 2.89   | 17.77  | 0.67   | 4.22   | 2.07   | 0.00   | 0.98   | 28.79  | 8.09   | 8                       | 0.627  | 18.2676     | 2.85882     | ATP6V1C2    | chr2  | 2.68 |
| NM_001242318 | 5.08   | 1.30   | 6.05   | 1.25   | 5.43   | 1.19   | 1.37   | 1.08   | 3.28   | 1.61   | 4.05   | 0.59   | 2.52   | 1.27   | 6.39   | 1.29   | 6.89   | 2.30   | 7                       | 0.627  | 4.56203     | 1.31953     | PDE7A       | chr8  | 2.68 |
| NM_058164    | 1.63   | 12.78  | 1.18   | 10.43  | 0.59   | 12.95  | 11.70  | 11.23  | 2.03   | 2.74   | 0.49   | 7.03   | 5.26   | 7.55   | 1.74   | 5.72   | 0.17   | 6.27   | 6                       | -0.624 | 2.755       | 8.52246     | OLFM2       | chr19 | 2.66 |
| NM_020845    | 21.92  | 4.85   | 31.06  | 7.41   | 42.19  | 6.81   | 5.98   | 5.87   | 11.10  | 5.14   | 43.14  | 5.28   | 13.83  | 7.21   | 10.18  | 6.21   | 46.83  | 6.68   | 6                       | 0.613  | 25.1373     | 6.16246     | PITPNM2     | chr12 | 2.59 |
| NM_001275    | 89.71  | 611.70 | 92.86  | 670.13 | 130.97 | 950.83 | 400.64 | 320.79 | 168.27 | 325.94 | 39.17  | 506.93 | 383.19 | 463.42 | 56.71  | 392.91 | 88.14  | 283.09 | 6                       | -0.611 | 161.074     | 502.859     | CHGA        | chr14 | 2.57 |
| NM_001198531 | 5.88   | 0.82   | 7.09   | 0.75   | 9.14   | 0.99   | 0.51   | 1.15   | 1.72   | 1.27   | 7.19   | 0.37   | 2.32   | 2.11   | 2.80   | 0.41   | 10.85  | 0.00   | 7                       | 0.605  | 5.27676     | 0.875456    | TCF7L2      | chr10 | 2.53 |
| NM_016438    | 9.98   | 0.40   | 11.65  | 1.13   | 10.15  | 5.20   | 1.77   | 0.46   | 38.93  | 3.73   | 19.08  | 0.27   | 4.02   | 0.88   | 10.18  | 1.05   | 9.85   | 0.15   | 8                       | 0.849  | 12.8466     | 1.47395     | HIGD1B      | chr17 | 6.64 |
| NM_001446    | 1.39   | 11.38  | 1.40   | 8.69   | 1.26   | 23.24  | 13.41  | 15.00  | 4.44   | 13.54  | 0.72   | 17.72  | 10.59  | 12.60  | 0.99   | 16.92  | 0.65   | 8.85   | 7                       | -0.714 | 3.87308     | 14.2158     | FABP7       | chr6  | 3.50 |
| NM_014564    | 1.66   | 20.07  | 1.25   | 15.83  | 0.90   | 20.13  | 15.20  | 13.21  | 3.39   | 11.34  | 0.00   | 10.73  | 6.40   | 8.51   | 1.82   | 8.20   | 0.00   | 10.70  | 7                       | -0.710 | 3.40104     | 13.1909     | LHX3        | chr9  | 3.45 |
| NM_080681    | 0.00   | 3.40   | 0.00   | 5.09   | 0.00   | 9.38   | 3.76   | 2.84   | 4.64   | 29.95  | 0.00   | 13.49  | 8.96   | 5.71   | 1.59   | 5.98   | 0.00   | 13.69  | 7                       | -0.691 | 2.1043      | 9.94793     | COL11A2     | chr6  | 3.23 |
| NM_001199159 | 1.33   | 12.95  | 0.59   | 6.77   | 0.24   | 7.11   | 5.58   | 5.48   | 1.77   | 3.81   | 0.18   | 4.65   | 2.26   | 1.70   | 0.27   | 1.73   | 0.06   | 3.71   | 7                       | -0.678 | 1.36572     | 5.32201     | P116        | chr6  | 3.10 |
| NM_003877    | 2.75   | 20.84  | 1.86   | 16.28  | 1.86   | 15.68  | 15.90  | 18.15  | 7.10   | 17.16  | 0.82   | 15.05  | 10.68  | 15.92  | 10.44  | 18.19  | 0.77   | 17.83  | 6                       | -0.667 | 5.79905     | 17.2336     | SOCS2       | chr12 | 3.00 |
| NM_001033082 | 8.92   | 1.16   | 7.58   | 0.92   | 14.06  | 1.43   | 1.07   | 1.43   | 2.71   | 1.07   | 8.34   | 0.31   | 1.55   | 1.05   | 7.36   | 0.78   | 23.27  | 2.77   | 7                       | 0.665  | 8.32031     | 1.21319     | MYCL1       | chr1  | 2.99 |
| NM_006841    | 20.59  | 2.19   | 21.70  | 1.60   | 25.40  | 1.94   | 1.91   | 1.13   | 1.84   | 0.67   | 16.39  | 0.92   | 4.10   | 1.28   | 0.43   | 1.06   | 23.56  | 1.08   | 8                       | 0.663  | 12.8806     | 1.3204      | SLC38A3     | chr3  | 2.96 |
| NM_001037582 | 6.56   | 42.00  | 6.95   | 30.13  | 5.05   | 37.69  | 40.99  | 39.93  | 5.42   | 13.60  | 12.28  | 15.28  | 14.52  | 18.54  | 2.07   | 18.75  | 2.59   | 16.91  | 7                       | -0.658 | 9.49237     | 25.871      | SCD5        | chr4  | 2.93 |
| NM_000361    | 70.88  | 7.48   | 41.53  | 6.03   | 67.34  | 5.93   | 5.11   | 5.24   | 3.05   | 3.18   | 28.90  | 1.78   | 3.43   | 1.84   | 33.92  | 2.29   | 52.58  | 6.26   | 6                       | 0.653  | 34.0825     | 4.44683     | THBD        | chr20 | 2.88 |
| NM_020722    | 3.34   | 0.60   | 3.91   | 0.65   | 8.09   | 0.72   | 0.36   | 0.36   | 1.68   | 0.57   | 4.96   | 0.53   | 1.37   | 0.73   | 6.24   | 0.83   | 11.06  | 1.89   | 7                       | 0.646  | 4.55588     | 0.765442    | KIAA1211    | chr4  | 2.82 |
| NM_013261    | 3.46   | 0.71   | 2.76   | 0.63   | 3.43   | 0.62   | 0.74   | 0.92   | 2.41   | 1.34   | 5.69   | 0.82   | 2.13   | 1.11   | 7.49   | 1.27   | 7.25   | 1.40   | 6                       | 0.645  | 3.92915     | 0.979337    | PPARGC1A    | chr4  | 2.82 |
| NM_005729    | 93.19  | 5.88   | 124.40 | 6.18   | 35.79  | 5.58   | 5.43   | 8.45   | 15.05  | 2.25   | 19.32  | 1.07   | 2.91   | 1.98   | 3.01   | 1.74   | 22.90  | 1.92   | 6                       | 0.612  | 35.7797     | 3.89561     | PPIF        | chr10 | 2.58 |
| NM_004382    | 95.23  | 0.79   | 124.65 | 2.63   | 53.82  | 1.02   | 0.26   | 0.51   | 10.72  | 0.71   | 13.26  | 0.00   | 1.08   | 0.00   | 39.62  | 0.00   | 18.91  | 1.70   | 8                       | 0.866  | 39.7285     | 0.816888    | CRHR1       | chr17 | 7.47 |
| NM_000080    | 67.86  | 3.26   | 70.49  | 4.61   | 110.94 | 5.37   | 2.07   | 1.77   | 54.12  | 3.08   | 27.24  | 0.51   | 5.06   | 0.95   | 7.56   | 1.45   | 46.61  | 5.96   | 8                       | 0.806  | 43.5513     | 2.9954      | CHRNA       | chr17 | 5.16 |
| NM_001039350 | 22.08  | 1.32   | 27.77  | 2.70   | 44.13  | 1.72   | 2.53   | 2.37   | 5.94   | 2.03   | 27.72  | 1.89   | 3.80   | 0.46   | 14.69  | 0.79   | 48.81  | 1.05   | 8                       | 0.800  | 21.9404     | 1.59285     | DPP6        | chr7  | 4.99 |
| NM_018286    | 12.71  | 1.29   | 12.28  | 1.84   | 17.89  | 1.84   | 1.26   | 1.98   | 13.33  | 1.74   | 27.46  | 1.73   | 9.18   | 1.02   | 9.84   | 1.17   | 70.61  | 4.14   | 8                       | 0.796  | 19.3954     | 1.86047     | TMEM100     | chr17 | 4.90 |
| NM_023067    | 0.38   | 11.47  | 0.42   | 9.54   | 0.26   | 12.40  | 5.75   | 4.91   | 1.96   | 6.56   | 0.03   | 9.09   | 4.77   | 10.19  | 0.10   | 9.62   | 0.01   | 7.46   | 8                       | -      |             |             |             |       |      |

Table S9. Cont.

| ID           | N1    |        | N2    |        | N3    |        | N4     |        | N5    |        | N6     |        | N7     |        | N8    |        | N9     |        | Differential ANPTs Recurrence | DI     | Avg (Tumor) | Avg (ANPTs) | Gene Symbol | Chr   | FC    |      |
|--------------|-------|--------|-------|--------|-------|--------|--------|--------|-------|--------|--------|--------|--------|--------|-------|--------|--------|--------|-------------------------------|--------|-------------|-------------|-------------|-------|-------|------|
|              | Tumor | ANPTs  | Tumor | ANPTs  | Tumor | ANPTs  | Tumor  | ANPTs  | Tumor | ANPTs  | Tumor  | ANPTs  | Tumor  | ANPTs  | Tumor | ANPTs  | Tumor  | ANPTs  |                               |        |             |             |             |       |       |      |
| NM_002448    | 1.69  | 18.25  | 0.70  | 10.44  | 0.42  | 8.86   | 5.81   | 7.02   | 2.77  | 9.25   | 0.47   | 7.02   | 3.26   | 7.53   | 0.63  | 7.12   | 0.40   | 5.21   | 8                             | -0.778 | 1.79492     | 8.96657     | MSX1        | chr4  | 4.50  |      |
| NM_001145108 | 0.28  | 8.92   | 0.54  | 9.19   | 1.57  | 13.18  | 8.96   | 11.20  | 1.08  | 2.40   | 0.00   | 5.43   | 3.06   | 6.97   | 0.39  | 5.62   | 0.46   | 8.70   | 8                             | -0.775 | 1.81558     | 7.9582      | NELL2       | chr12 | 4.45  |      |
| NM_004778    | 3.22  | 0.41   | 2.82  | 0.30   | 2.90  | 0.82   | 0.48   | 0.23   | 20.65 | 2.66   | 11.64  | 0.14   | 3.60   | 0.81   | 3.69  | 0.65   | 5.06   | 0.28   | 9                             | 0.765  | 6.00721     | 0.69912     | PTGDR2      | chr11 | 4.26  |      |
| NM_001008404 | 7.11  | 0.16   | 31.40 | 0.22   | 29.96 | 0.48   | 0.15   | 0.30   | 26.24 | 0.70   | 7.57   | 0.06   | 1.74   | 0.11   | 0.02  | 0.07   | 6.71   | 0.02   | 9                             | 0.762  | 12.3204     | 0.234088    | C14orf180   | chr14 | 4.20  |      |
| NM_001038705 | 0.24  | 1.81   | 0.10  | 2.43   | 0.12  | 1.95   | 2.46   | 5.19   | 1.70  | 3.72   | 0.00   | 4.40   | 4.97   | 5.54   | 0.00  | 4.06   | 0.00   | 2.17   | 8                             | -0.760 | 1.06384     | 3.4763      | GPR149      | chr3  | 4.17  |      |
| NM_170676    | 0.26  | 3.64   | 0.01  | 3.21   | 0.00  | 3.06   | 3.49   | 2.82   | 2.50  | 6.66   | 0.00   | 8.69   | 2.89   | 4.12   | 0.08  | 6.47   | 0.00   | 8.53   | 7                             | -0.760 | 1.02438     | 5.24318     | MEIS2       | chr15 | 4.16  |      |
| NM_006078    | 4.39  | 0.85   | 9.58  | 0.59   | 5.34  | 0.43   | 0.14   | 0.39   | 8.34  | 1.62   | 9.24   | 0.63   | 2.54   | 0.83   | 4.90  | 0.77   | 16.42  | 1.79   | 9                             | 0.757  | 6.76393     | 0.877184    | CACNG2      | chr22 | 4.11  |      |
| NM_004484    | 12.01 | 36.08  | 1.26  | 54.51  | 2.13  | 40.00  | 38.78  | 35.28  | 2.87  | 25.13  | 0.00   | 13.86  | 21.86  | 48.00  | 1.35  | 11.07  | 0.00   | 24.15  | 8                             | -0.757 | 8.91792     | 32.0085     | GPC3        | chrX  | 4.11  |      |
| NM_181755    | 0.83  | 5.24   | 0.26  | 4.03   | 0.00  | 4.58   | 3.84   | 4.85   | 6.80  | 11.67  | 0.00   | 13.74  | 8.99   | 14.64  | 0.33  | 9.23   | 0.00   | 16.98  | 6                             | -0.750 | 2.33964     | 9.4395      | HSD11B1     | chr1  | 4.00  |      |
| NM_014917    | 0.47  | 5.37   | 0.08  | 2.47   | 0.31  | 2.62   | 2.09   | 2.11   | 1.22  | 4.59   | 0.12   | 3.07   | 2.85   | 5.05   | 0.82  | 4.36   | 0.01   | 3.75   | 7                             | -0.745 | 0.8861      | 3.70967     | NTNG1       | chr1  | 3.92  |      |
| NM_001130067 | 1.76  | 0.00   | 4.18  | 0.97   | 2.31  | 0.35   | 0.40   | 0.62   | 6.35  | 0.00   | 4.59   | 0.00   | 4.59   | 0.00   | 4.51  | 0.00   | 1.24   | 1.14   | 7                             | 0.735  | 3.3256      | 0.34232     | TRIM2       | chr4  | 3.77  |      |
| NM_002071    | 0.31  | 3.39   | 0.00  | 2.90   | 0.10  | 3.13   | 3.07   | 3.49   | 2.63  | 10.66  | 0.04   | 11.62  | 10.80  | 14.83  | 0.35  | 16.98  | 0.00   | 16.78  | 7                             | -0.764 | 1.92189     | 9.30976     | GNAL        | chr18 | 4.24  |      |
| NM_001105192 | 1.40  | 4.22   | 0.81  | 7.33   | 0.58  | 3.36   | 5.57   | 7.39   | 2.18  | 3.82   | 0.00   | 4.54   | 1.92   | 4.42   | 0.08  | 2.94   | 0.00   | 2.53   | 7                             | -0.733 | 1.39317     | 4.50438     | TLE3        | chr15 | 3.75  |      |
| NM_003888    | 1.78  | 19.75  | 0.58  | 12.23  | 0.78  | 12.51  | 9.46   | 10.64  | 3.45  | 10.03  | 0.38   | 13.55  | 5.73   | 7.03   | 0.93  | 7.31   | 0.00   | 16.53  | 7                             | -0.733 | 2.56637     | 12.176      | ALDH1A2     | chr15 | 3.74  |      |
| NM_015025    | 0.98  | 6.69   | 0.42  | 5.21   | 0.17  | 4.28   | 5.53   | 5.24   | 3.45  | 9.64   | 0.01   | 11.01  | 7.37   | 9.75   | 0.29  | 12.10  | 0.00   | 12.14  | 7                             | -0.733 | 2.0259      | 8.44953     | MYT1L       | chr2  | 3.74  |      |
| NM_002968    | 0.75  | 7.53   | 0.42  | 5.00   | 0.27  | 5.05   | 5.38   | 4.65   | 2.89  | 8.83   | 0.01   | 8.69   | 4.19   | 6.33   | 1.44  | 7.84   | 0.04   | 8.87   | 7                             | -0.732 | 1.70952     | 6.97682     | SALL1       | chr16 | 3.73  |      |
| NM_002023    | 3.01  | 16.71  | 1.24  | 15.73  | 0.85  | 15.34  | 11.97  | 17.15  | 2.92  | 7.77   | 0.73   | 6.62   | 4.14   | 5.15   | 0.58  | 4.94   | 0.02   | 4.37   | 7                             | -0.731 | 2.82848     | 10.4193     | FMOD        | chr1  | 3.71  |      |
| NM_005979    | 0.81  | 4.35   | 1.25  | 6.13   | 0.33  | 8.14   | 0.99   | 2.95   | 0.60  | 2.14   | 0.00   | 5.58   | 0.86   | 2.87   | 0.38  | 4.10   | 0.74   | 1.11   | 8                             | -0.729 | 0.663753    | 4.15109     | S100A13     | chr1  | 3.69  |      |
| NM_032784    | 38.68 | 1.35   | 42.10 | 1.58   | 70.49 | 1.70   | 0.48   | 1.51   | 84.49 | 7.52   | 242.13 | 2.32   | 22.11  | 2.39   | 2.32  | 1.11   | 256.55 | 7.53   | 9                             | 0.723  | 84.3726     | 3.00139     | RSPO3       | chr6  | 3.61  |      |
| NM_012338    | 0.69  | 6.66   | 0.35  | 4.96   | 0.41  | 6.46   | 6.91   | 8.63   | 5.22  | 10.97  | 0.97   | 8.83   | 8.07   | 10.81  | 1.75  | 11.22  | 0.19   | 9.70   | 7                             | -0.717 | 2.7284      | 8.69409     | TSPAN12     | chr7  | 3.54  |      |
| NM_004616    | 9.86  | 1.02   | 12.36 | 0.81   | 15.24 | 0.58   | 0.38   | 0.80   | 5.16  | 0.75   | 22.81  | 0.79   | 0.31   | 0.16   | 2.59  | 0.29   | 16.59  | 0.92   | 8                             | 0.716  | 9.47787     | 0.679506    | TSPAN8      | chr12 | 3.52  |      |
| NM_006998    | 10.29 | 71.01  | 3.98  | 48.36  | 1.76  | 41.69  | 70.28  | 82.44  | 21.44 | 53.92  | 0.23   | 44.79  | 13.10  | 20.95  | 11.04 | 28.91  | 2.72   | 40.21  | 7                             | -0.711 | 14.9832     | 48.03       | SCGN        | chr6  | 3.46  |      |
| NM_006271    | 10.28 | 59.33  | 7.93  | 83.21  | 3.98  | 87.06  | 21.85  | 26.85  | 12.82 | 20.11  | 4.41   | 25.70  | 4.25   | 9.26   | 1.38  | 5.93   | 0.00   | 22.10  | 7                             | -0.708 | 7.43308     | 37.7261     | S100A1      | chr1  | 3.42  |      |
| NM_144633    | 0.88  | 7.08   | 0.17  | 5.38   | 0.25  | 5.33   | 5.20   | 7.09   | 1.94  | 6.01   | 0.12   | 7.16   | 6.71   | 7.24   | 2.70  | 7.16   | 0.01   | 7.87   | 7                             | -0.705 | 1.99743     | 6.70115     | KCNH8       | chr3  | 3.39  |      |
| NM_198681    | 0.47  | 3.32   | 0.49  | 5.04   | 0.31  | 2.89   | 5.65   | 4.17   | 1.10  | 5.16   | 0.00   | 3.74   | 3.48   | 4.51   | 0.05  | 3.66   | 0.16   | 2.48   | 7                             | -0.703 | 1.30106     | 3.88714     | PLEKHG5     | chr1  | 3.37  |      |
| NM_018076    | 0.45  | 3.37   | 0.44  | 3.73   | 0.36  | 2.28   | 2.73   | 4.45   | 2.30  | 5.03   | 0.52   | 10.66  | 6.57   | 8.29   | 2.61  | 10.14  | 0.75   | 7.32   | 7                             | -0.702 | 1.85839     | 6.14156     | ARMC4       | chr10 | 3.36  |      |
| NM_002775    | 19.77 | 134.27 | 11.63 | 98.22  | 9.45  | 70.44  | 87.43  | 111.71 | 38.47 | 79.78  | 8.71   | 108.97 | 68.77  | 97.49  | 10.90 | 121.24 | 9.96   | 68.46  | 7                             | -0.702 | 29.4542     | 98.9555     | HTRA1       | chr10 | 3.35  |      |
| NM_133373    | 1.26  | 5.06   | 0.55  | 4.10   | 0.35  | 3.62   | 3.47   | 2.91   | 1.69  | 6.27   | 0.40   | 1.99   | 1.07   | 2.33   | 0.68  | 3.14   | 0.17   | 2.51   | 8                             | -0.700 | 1.07327     | 3.54647     | PLCD3       | chr17 | 3.33  |      |
| NM_173509    | 2.99  | 18.14  | 1.05  | 10.89  | 0.84  | 17.39  | 15.60  | 11.87  | 9.13  | 22.70  | 0.07   | 26.97  | 15.84  | 20.94  | 0.58  | 21.58  | 0.15   | 43.13  | 7                             | -0.696 | 5.13848     | 21.5127     | FAM163A     | chr1  | 3.28  |      |
| NM_006663    | 3.16  | 8.00   | 2.79  | 15.23  | 0.13  | 3.61   | 5.13   | 4.17   | 1.19  | 3.07   | 0.00   | 7.98   | 1.73   | 3.99   | 0.42  | 4.79   | 0.97   | 4.12   | 8                             | -0.694 | 1.72402     | 6.10631     | PPP1R13L    | chr19 | 3.26  |      |
| NM_001146    | 0.66  | 2.88   | 0.00  | 2.37   | 0.01  | 3.50   | 2.69   | 2.01   | 2.22  | 6.27   | 0.00   | 10.09  | 5.94   | 5.73   | 1.33  | 7.52   | 0.02   | 13.19  | 7                             | -0.693 | 1.43127     | 5.95102     | ANGPT1      | chr8  | 3.25  |      |
| NM_198481    | 1.04  | 7.58   | 0.81  | 16.20  | 0.04  | 3.14   | 9.66   | 8.04   | 0.24  | 0.32   | 0.00   | 6.06   | 1.89   | 4.70   | 0.00  | 4.27   | 0.00   | 3.78   | 7                             | -0.692 | 1.52016     | 6.00986     | VSTM1       | chr19 | 3.25  |      |
| NM_000406    | 2.13  | 31.90  | 1.36  | 23.03  | 0.27  | 3.92   | 10.05  | 11.58  | 0.57  | 1.45   | 0.00   | 13.03  | 3.26   | 4.46   | 0.06  | 8.26   | 0.00   | 10.83  | 7                             | -0.689 | 1.9675      | 12.0511     | GNRHR       | chr4  | 3.21  |      |
| NM_015461    | 1.57  | 5.52   | 0.51  | 3.89   | 0.36  | 4.04   | 4.14   | 3.56   | 1.63  | 3.98   | 0.43   | 4.86   | 2.93   | 4.71   | 0.84  | 6.71   | 0.43   | 6.47   | 7                             | -0.687 | 1.42626     | 4.86103     | ZNF521      | chr18 | 3.20  |      |
| NM_000325    | 1.02  | 8.10   | 0.45  | 8.99   | 0.33  | 9.44   | 7.77   | 6.26   | 0.91  | 2.06   | 0.00   | 4.86   | 3.51   | 3.78   | 0.22  | 4.32   | 0.00   | 3.83   | 7                             | -0.678 | 1.57751     | 5.73724     | PITX2       | chr4  | 3.11  |      |
| NM_006517    | 5.41  | 28.10  | 1.62  | 19.35  | 2.02  | 26.37  | 20.36  | 15.83  | 2.82  | 6.80   | 0.47   | 7.20   | 6.33   | 8.99   | 1.05  | 9.68   | 0.27   | 8.56   | 7                             | -0.678 | 4.4832      | 14.5416     | SLC16A2     | chrX  | 3.10  |      |
| NM_001122741 | 0.51  | 4.77   | 0.39  | 5.44   | 0.30  | 4.17   | 2.00   | 1.88   | 0.73  | 1.50   | 0.05   | 2.20   | 1.47   | 2.50   | 0.23  | 4.44   | 0.00   | 3.63   | 7                             | -0.677 | 0.631294    | 3.39299     | ESR1        | chr6  | 3.09  |      |
| NM_005709    | 1.31  | 5.95   | 1.09  | 12.32  | 0.62  | 8.09   | 1.73   | 2.88   | 4.44  | 9.37   | 0.02   | 13.18  | 4.66   | 5.21   | 1.16  | 2.63   | 0.29   | 17.74  | 7                             | -0.676 | 1.70162     | 8.5971      | USH1C       | chr11 | 3.08  |      |
| NM_000599    | 32.89 | 257.26 | 20.85 | 240.51 | 15.81 | 155.30 | 162.26 | 160.05 | 49.68 | 138.20 | 9.79   | 198.44 | 121.37 | 127.03 | 27.95 | 140.78 | 6.21   | 197.93 | 7                             | -0.675 | 49.6462     | 179.499     | IGFBP5      | chr2  | 3.08  |      |
| NM_006198    | 6.46  | 19.65  | 1.36  | 21.72  | 2.54  | 25.32  | 13.11  | 12.07  | 6.47  | 17.78  | 1.32   | 18.25  | 4.49   | 18.08  | 11.77 | 18.18  | 0.32   | 12.19  | 7                             | -0.674 | 5.31696     | 18.1396     | PCP4        | chr21 | 3.07  |      |
| NM_173681    | 24.82 | 2.02   | 6.45  | 1.73   | 12.35 | 2.08   | 1.69   | 2.17   | 10.29 | 0.99   | 21.80  | 0.52   | 4.23   | 0.57   | 0.61  | 0.50   | 5.82   | 0.95   | 7                             | 0.674  | 9.78487     | 1.28148     | ATG9B       | chr7  | 3.06  |      |
| NM_001037    | 50.63 | 8.16   | 78.49 | 8.23   | 35.80 | 7.67   | 6.04   | 4.71   | 18.38 | 5.18   | 53.92  | 4.84   | 13.04  | 3.18   | 5.07  | 4.11   | 39.94  | 2.61   | 7                             | 0.673  | 33.4806     | 5.41018     | SCN1B       | chr19 | 3.06  |      |
| NM_004753    | 6.20  | 35.05  | 4.24  | 39.33  | 1.88  | 19.61  | 22.76  | 22.77  | 8.57  | 27.15  | 1.92   | 12.98  | 9.95   | 11.91  | 2.38  | 10.54  | 0.67   | 13.60  | 7                             | -0.672 | 6.50672     | 21.438      | DHRS3       | chr1  | 3.05  |      |
| NM_031311    | 3.12  | 7.60   | 0.50  | 7.53   | 1.62  | 5.39   | 11.72  | 13.35  | 2.51  | 6.10   | 0.46   | 5.35   | 3.68   | 6.53   | 1.51  | 8.88   | 0.58   | 6.89   | 7                             | -0.670 | 2.85666     | 7.51403     | CPVL        | chr7  | 3.03  |      |
| NM_033641    | 1.97  | 4.70   | 0.28  | 4.23   | 0.20  | 3.73   | 5.54   | 3.82   | 2.15  | 5.49   | 0.00   | 8.26   | 4.50   | 6.38   | 0.35  | 7.51   | 0.00   | 5.42   | 7                             | -0.667 | 1.66589     | 5.50447     | COL4A6      | chrX  | 3.01  |      |
| NM_030583    | 0.64  | 4.20   | 0.33  | 3.93   | 0.44  | 3.28   | 2.18   | 2.10   | 2.79  | 4.18   | 0.50   | 4.98   | 2.94   | 5.66   | 0.88  | 3.55   | 0.43   | 4.64   | 6                             | -0.667 | 1.23643     | 4.05834     | MATN2       | chr8  | 3.00  |      |
| NM_003667    | 22.28 | 0.05   | 17.28 | 0.02   | 46.26 | 0.13   | 0.31   | 0.04   | 0.04  | 0.04   | 0.04   | 4.85   | 0.00   | 0.18   | 0.23  | 8.77   | 0.08   | 8.30   | 0.05                          | 7      | 0.664       | 12.0301     | 0.0720564   | LGR5  | chr12 | 2.98 |

Table S9. Cont.

| ID           | N1     |        | N2     |        | N3     |        | N4     |        | N5     |        | N6    |        | N7     |        | N8    |        | N9    |        | Differential Recurrence | DI     | Avg (Tumor) | Avg (ANPTs) | Gene Symbol | Chr   | FC   |
|--------------|--------|--------|--------|--------|--------|--------|--------|--------|--------|--------|-------|--------|--------|--------|-------|--------|-------|--------|-------------------------|--------|-------------|-------------|-------------|-------|------|
|              | Tumor  | ANPTs  | Tumor  | ANPTs  | Tumor  | ANPTs  | Tumor  | ANPTs  | Tumor  | ANPTs  | Tumor | ANPTs  | Tumor  | ANPTs  | Tumor | ANPTs  | Tumor | ANPTs  |                         |        |             |             |             |       |      |
| NM_001993    | 7.41   | 43.40  | 3.49   | 33.56  | 3.08   | 31.12  | 31.80  | 34.17  | 48.25  | 107.95 | 3.69  | 72.62  | 67.31  | 78.30  | 21.46 | 60.62  | 1.24  | 123.24 | 7                       | -0.664 | 20.8595     | 64.9965     | F3          | chr1  | 2.97 |
| NM_030643    | 1.16   | 8.29   | 0.35   | 9.99   | 0.37   | 5.91   | 12.03  | 21.95  | 2.28   | 5.31   | 0.27  | 5.83   | 7.59   | 10.38  | 5.93  | 5.37   | 0.19  | 4.55   | 6                       | -0.663 | 3.35235     | 8.61906     | APOL4       | chr22 | 2.97 |
| NM_198235    | 0.77   | 2.26   | 0.52   | 3.38   | 0.74   | 4.72   | 0.65   | 5.72   | 0.74   | 1.57   | 0.18  | 1.53   | 2.25   | 2.48   | 0.38  | 2.36   | 0.00  | 1.31   | 8                       | -0.661 | 0.692303    | 2.81541     | RNASE1      | chr14 | 2.95 |
| NM_033520    | 9.42   | 34.95  | 5.60   | 56.88  | 1.03   | 33.07  | 46.23  | 42.83  | 17.72  | 52.77  | 12.05 | 66.90  | 14.97  | 22.90  | 3.91  | 21.95  | 3.25  | 14.19  | 7                       | -0.661 | 12.6857     | 38.4917     | C19orf33    | chr19 | 2.95 |
| NM_021191    | 1.38   | 16.68  | 0.74   | 11.69  | 0.71   | 5.98   | 7.25   | 7.38   | 6.47   | 16.08  | 0.42  | 35.10  | 13.88  | 17.83  | 16.00 | 29.80  | 1.32  | 22.12  | 6                       | -0.661 | 5.35256     | 18.0733     | NEUROD4     | chr12 | 2.95 |
| NM_002084    | 119.49 | 590.64 | 51.79  | 492.15 | 39.58  | 293.41 | 281.50 | 274.94 | 280.70 | 681.38 | 60.00 | 605.99 | 342.59 | 377.41 | 54.43 | 459.35 | 31.66 | 534.36 | 7                       | -0.660 | 140.194     | 478.847     | GPX3        | chr5  | 2.94 |
| NM_000587    | 0.69   | 3.53   | 0.19   | 3.40   | 0.17   | 2.52   | 1.79   | 1.93   | 4.23   | 7.79   | 0.47  | 4.19   | 2.62   | 2.71   | 0.24  | 2.53   | 0.06  | 4.78   | 6                       | -0.658 | 1.16174     | 3.71025     | C7          | chr5  | 2.92 |
| NM_130808    | 45.44  | 3.61   | 59.26  | 3.51   | 65.65  | 4.84   | 2.98   | 3.28   | 16.67  | 1.99   | 30.96 | 1.79   | 4.48   | 2.89   | 1.99  | 2.34   | 58.92 | 5.10   | 6                       | 0.653  | 31.8151     | 3.25965     | CPNE4       | chr3  | 2.88 |
| NM_006623    | 6.38   | 29.83  | 3.15   | 23.93  | 3.14   | 21.02  | 20.40  | 17.90  | 13.19  | 34.59  | 3.94  | 27.50  | 20.46  | 26.69  | 6.13  | 29.96  | 0.39  | 22.90  | 7                       | -0.652 | 8.57494     | 26.034      | PHGDH       | chr1  | 2.88 |
| NM_001025390 | 0.17   | 1.90   | 0.23   | 1.84   | 0.26   | 2.04   | 0.95   | 1.10   | 0.88   | 2.02   | 0.00  | 1.94   | 3.24   | 3.10   | 1.35  | 5.37   | 0.28  | 2.38   | 7                       | -0.651 | 0.81804     | 2.41119     | AMPD3       | chr11 | 2.86 |
| NM_006227    | 1.85   | 8.78   | 0.66   | 11.28  | 1.03   | 9.76   | 5.52   | 5.67   | 0.00   | 1.68   | 0.00  | 0.80   | 1.05   | 2.06   | 0.27  | 2.41   | 0.31  | 2.04   | 7                       | -0.650 | 1.18709     | 4.94303     | PLTP        | chr20 | 2.86 |
| NM_000582    | 12.85  | 0.00   | 10.11  | 0.15   | 1.92   | 0.00   | 0.62   | 0.46   | 0.25   | 0.77   | 22.29 | 0.00   | 0.82   | 0.00   | 12.40 | 0.44   | 4.60  | 0.46   | 8                       | 0.650  | 7.31808     | 0.254295    | SPP1        | chr4  | 2.86 |
| NM_138295    | 1.19   | 0.04   | 7.80   | 0.15   | 26.00  | 0.34   | 0.12   | 0.10   | 2.54   | 0.13   | 1.35  | 0.03   | 0.24   | 0.07   | 0.11  | 0.06   | 1.91  | 0.03   | 7                       | 0.650  | 4.58405     | 0.105711    | PKD1L1      | chr7  | 2.85 |
| NM_001113490 | 0.91   | 6.86   | 0.47   | 6.16   | 0.85   | 5.58   | 6.05   | 6.02   | 1.13   | 4.24   | 0.41  | 4.32   | 5.01   | 3.85   | 0.84  | 4.51   | 0.09  | 6.42   | 7                       | -0.650 | 1.7513      | 5.32956     | AMOT        | chrX  | 2.85 |
| NM_001037160 | 0.42   | 4.07   | 0.22   | 3.97   | 0.21   | 3.47   | 3.94   | 5.35   | 1.04   | 1.35   | 0.13  | 1.15   | 2.20   | 1.83   | 0.00  | 1.68   | 0.13  | 1.24   | 6                       | -0.647 | 0.921785    | 2.67876     | CYS1        | chr2  | 2.83 |
| NM_001164257 | 2.43   | 12.01  | 1.81   | 7.08   | 0.24   | 4.30   | 6.86   | 7.77   | 1.07   | 7.60   | 0.00  | 2.43   | 2.10   | 1.50   | 0.62  | 2.28   | 0.80  | 3.17   | 7                       | -0.647 | 1.76833     | 5.35072     | C17orf72    | chr17 | 2.83 |
| NM_176813    | 0.96   | 10.55  | 0.57   | 10.19  | 0.00   | 8.48   | 7.16   | 5.94   | 1.09   | 3.65   | 0.00  | 11.01  | 2.46   | 4.38   | 3.99  | 3.47   | 0.00  | 3.70   | 6                       | -0.647 | 1.8038      | 6.81801     | AGR3        | chr7  | 2.83 |
| NM_013280    | 6.97   | 0.21   | 14.89  | 0.27   | 4.66   | 0.23   | 0.25   | 0.11   | 1.40   | 0.07   | 5.78  | 0.04   | 0.96   | 0.22   | 0.32  | 0.00   | 5.05  | 0.16   | 9                       | 0.646  | 4.47702     | 0.14489     | FLRT1       | chr11 | 2.83 |
| NM_014643    | 2.19   | 8.24   | 2.18   | 6.77   | 0.40   | 5.77   | 8.28   | 8.26   | 2.96   | 8.45   | 0.28  | 8.46   | 5.56   | 7.28   | 2.72  | 7.07   | 0.08  | 10.32  | 7                       | -0.645 | 2.73999     | 7.84666     | ZNF516      | chr18 | 2.81 |
| NM_012474    | 29.96  | 4.16   | 22.99  | 4.79   | 30.44  | 4.56   | 2.97   | 4.33   | 8.59   | 1.61   | 7.78  | 1.18   | 4.71   | 1.53   | 2.82  | 1.57   | 16.02 | 2.72   | 7                       | 0.645  | 14.0308     | 2.93778     | UCK2        | chr1  | 2.81 |
| NM_001170963 | 1.65   | 39.83  | 1.53   | 8.32   | 1.89   | 3.05   | 1.85   | 4.36   | 6.89   | 17.80  | 0.00  | 21.97  | 17.06  | 16.24  | 1.30  | 17.17  | 7.16  | 15.02  | 7                       | -0.643 | 4.37106     | 15.973      | IGSF1       | chrX  | 2.80 |
| NM_003507    | 1.09   | 10.20  | 1.76   | 7.95   | 1.14   | 6.48   | 6.00   | 5.85   | 1.97   | 3.82   | 0.05  | 3.11   | 3.37   | 3.23   | 0.82  | 5.24   | 0.14  | 4.51   | 6                       | -0.642 | 1.81482     | 5.59805     | FZD7        | chr2  | 2.79 |
| NM_000800    | 0.80   | 5.53   | 0.33   | 3.75   | 0.00   | 3.80   | 3.70   | 3.41   | 2.71   | 2.57   | 0.00  | 3.93   | 2.93   | 3.46   | 0.13  | 6.94   | 0.00  | 2.96   | 6                       | -0.639 | 1.17801     | 4.04017     | FGF1        | chr5  | 2.77 |
| NM_002403    | 4.91   | 26.03  | 5.95   | 18.51  | 0.00   | 9.42   | 10.56  | 13.35  | 1.03   | 3.64   | 2.39  | 9.13   | 5.39   | 10.46  | 1.79  | 3.76   | 4.55  | 10.93  | 7                       | -0.639 | 4.06329     | 11.6929     | MFAP2       | chr1  | 2.77 |
| NM_017711    | 0.67   | 5.73   | 0.00   | 3.13   | 0.38   | 4.72   | 3.23   | 3.33   | 0.80   | 0.92   | 0.00  | 1.45   | 0.75   | 1.55   | 0.12  | 1.48   | 0.00  | 2.19   | 7                       | -0.636 | 0.660344    | 2.72132     | GDPD2       | chrX  | 2.75 |
| NM_182914    | 7.17   | 0.47   | 16.70  | 1.99   | 11.68  | 1.98   | 2.79   | 3.74   | 12.92  | 5.48   | 20.26 | 4.64   | 7.34   | 6.49   | 61.69 | 6.38   | 25.40 | 5.70   | 7                       | 0.629  | 18.4396     | 4.09437     | SYNE2       | chr14 | 2.70 |
| NM_014265    | 0.99   | 5.80   | 0.32   | 3.01   | 0.25   | 3.08   | 4.11   | 3.69   | 3.12   | 9.53   | 0.35  | 5.71   | 4.58   | 4.93   | 3.92  | 7.13   | 0.28  | 7.44   | 6                       | -0.629 | 1.99274     | 5.59059     | ADAM28      | chr8  | 2.70 |
| NM_138568    | 1.61   | 6.24   | 1.00   | 8.24   | 0.52   | 4.33   | 4.73   | 3.77   | 1.57   | 4.01   | 0.48  | 3.10   | 3.38   | 3.24   | 1.25  | 4.23   | 0.06  | 2.71   | 7                       | -0.626 | 1.62213     | 4.43192     | EXOC3L2     | chr19 | 2.68 |
| NM_001007097 | 1.91   | 4.88   | 0.31   | 3.59   | 0.61   | 4.25   | 5.84   | 5.59   | 1.30   | 2.70   | 0.42  | 5.29   | 4.96   | 5.14   | 0.38  | 2.35   | 0.20  | 5.39   | 7                       | -0.624 | 1.77023     | 4.3519      | NTRK2       | chr9  | 2.66 |
| NM_000120    | 9.84   | 0.45   | 25.44  | 2.19   | 12.43  | 1.53   | 0.59   | 0.62   | 0.23   | 0.00   | 1.84  | 0.00   | 0.61   | 0.30   | 33.16 | 0.30   | 1.33  | 0.17   | 8                       | 0.624  | 9.49584     | 0.616705    | EPHX1       | chr1  | 2.66 |
| NM_024735    | 61.07  | 13.73  | 105.73 | 14.25  | 109.67 | 13.53  | 10.26  | 10.97  | 23.27  | 12.63  | 74.64 | 8.15   | 16.77  | 11.75  | 37.84 | 9.82   | 58.67 | 18.46  | 6                       | 0.621  | 55.3231     | 12.5864     | FBXO31      | chr16 | 2.64 |
| NM_031891    | 8.22   | 0.62   | 8.82   | 0.69   | 12.28  | 0.65   | 0.51   | 0.68   | 0.56   | 0.33   | 11.36 | 0.16   | 0.67   | 0.31   | 1.44  | 0.08   | 11.87 | 1.61   | 7                       | 0.621  | 6.19342     | 0.569858    | CDH20       | chr18 | 2.64 |
| NM_021168    | 15.71  | 2.25   | 6.52   | 2.22   | 9.00   | 1.47   | 2.86   | 1.00   | 8.99   | 3.29   | 7.51  | 3.10   | 2.97   | 3.02   | 14.77 | 2.89   | 7.49  | 3.31   | 8                       | 0.621  | 8.42429     | 2.50629     | RAB40C      | chr16 | 2.64 |
| NM_002501    | 5.22   | 14.86  | 1.57   | 11.02  | 0.84   | 13.40  | 12.84  | 7.77   | 5.96   | 13.77  | 2.08  | 15.85  | 9.25   | 14.48  | 2.00  | 12.13  | 1.37  | 13.95  | 7                       | -0.620 | 4.56958     | 13.0244     | NFIX        | chr19 | 2.63 |
| NM_020848    | 1.11   | 2.67   | 0.47   | 5.85   | 0.37   | 2.25   | 3.72   | 3.17   | 1.56   | 4.88   | 0.95  | 5.86   | 5.12   | 4.39   | 0.86  | 4.08   | 0.39  | 5.48   | 7                       | -0.619 | 1.61734     | 4.29134     | KIAA1462    | chr10 | 2.63 |
| NM_000915    | 11.05  | 29.14  | 1.18   | 58.76  | 0.13   | 1.62   | 35.57  | 24.18  | 1.81   | 2.93   | 0.23  | 8.23   | 1.24   | 0.47   | 0.00  | 3.65   | 0.00  | 2.10   | 7                       | -0.617 | 5.69113     | 14.5656     | OXT         | chr20 | 2.61 |
| NM_021248    | 11.16  | 1.32   | 20.84  | 0.80   | 13.01  | 0.93   | 0.37   | 0.81   | 2.38   | 0.25   | 5.64  | 0.14   | 0.54   | 0.08   | 0.73  | 0.03   | 4.70  | 0.46   | 9                       | 0.616  | 6.59668     | 0.537555    | CDH22       | chr20 | 2.60 |
| NM_177963    | 1.05   | 5.32   | 0.29   | 4.14   | 0.22   | 4.16   | 4.19   | 2.45   | 1.96   | 3.20   | 0.22  | 6.38   | 4.59   | 4.34   | 0.40  | 5.73   | 0.04  | 5.35   | 6                       | -0.615 | 1.43936     | 4.56256     | SYT11       | chr11 | 2.60 |
| NM_024081    | 0.55   | 5.05   | 0.64   | 2.75   | 1.12   | 4.51   | 4.00   | 3.53   | 1.67   | 5.12   | 1.30  | 4.35   | 2.98   | 3.77   | 0.31  | 3.27   | 0.69  | 3.32   | 7                       | -0.609 | 1.47354     | 3.9624      | PRRG4       | chr11 | 2.56 |
| NM_003256    | 2.98   | 10.44  | 2.81   | 9.77   | 1.69   | 10.21  | 10.08  | 13.04  | 1.66   | 3.73   | 0.20  | 2.91   | 3.38   | 3.85   | 1.49  | 3.30   | 0.17  | 3.26   | 7                       | -0.607 | 2.71861     | 6.72398     | TIME4       | chr3  | 2.55 |
| NM_020546    | 22.43  | 3.63   | 22.42  | 4.16   | 21.52  | 3.41   | 3.94   | 3.53   | 4.68   | 2.13   | 11.58 | 2.51   | 3.98   | 3.35   | 27.52 | 4.16   | 18.35 | 3.90   | 7                       | 0.607  | 15.1575     | 3.41924     | ADCY2       | chr5  | 2.54 |
| NM_024572    | 1.06   | 5.70   | 0.73   | 2.56   | 0.50   | 4.00   | 3.45   | 1.57   | 2.06   | 5.65   | 0.00  | 3.77   | 1.99   | 2.86   | 0.15  | 3.12   | 0.00  | 4.94   | 8                       | -0.605 | 1.10593     | 3.79552     | GALNT14     | chr2  | 2.53 |
| NM_032963    | 25.43  | 81.84  | 26.45  | 187.39 | 17.59  | 145.55 | 189.19 | 153.18 | 18.83  | 32.53  | 6.70  | 29.91  | 19.11  | 25.45  | 4.39  | 19.97  | 0.71  | 16.40  | 6                       | -0.602 | 34.266      | 76.913      | CCL14       | chr17 | 2.51 |
| NM_015687    | 4.47   | 1.30   | 6.13   | 1.85   | 8.90   | 1.43   | 1.43   | 1.35   | 10.24  | 4.03   | 23.25 | 4.10   | 5.40   | 4.33   | 14.89 | 3.00   | 22.09 | 5.81   | 7                       | 0.601  | 10.7563     | 3.02213     | FILIP1      | chr6  | 2.51 |

**Table S10.** ACTH highly related-genotypes.

| <b>Gene</b>      | <b>FC</b> | <b>PCC</b> | <b>p Value</b> | <b>FDR</b> |
|------------------|-----------|------------|----------------|------------|
| <i>PPP1R1B</i>   | 4.18      | 0.980      | <0.001         | 0.001      |
| <i>TNFAIP8L3</i> | 3.12      | 0.961      | <0.001         | 0.001      |
| <i>AHRR</i>      | 2.65      | 0.950      | <0.001         | 0.003      |
| <i>PNMT</i>      | 3.51      | 0.944      | <0.001         | 0.003      |
| <i>THBS2</i>     | 2.52      | 0.939      | <0.001         | 0.003      |
| <i>LRRC10B</i>   | 2.73      | 0.938      | <0.001         | 0.003      |
| <i>CREB3L1</i>   | 3.82      | 0.931      | <0.001         | 0.004      |
| <i>IER3</i>      | 2.54      | 0.929      | <0.001         | 0.004      |
| <i>GPR50</i>     | 3.15      | 0.929      | <0.001         | 0.003      |
| <i>FOSB</i>      | 3.00      | 0.924      | <0.001         | 0.003      |
| <i>TFPI2</i>     | 3.27      | 0.922      | <0.001         | 0.004      |
| <i>CELSR1</i>    | 2.53      | 0.915      | 0.001          | 0.005      |
| <i>HMGN5</i>     | 2.55      | 0.909      | 0.001          | 0.005      |
| <i>STRC</i>      | 3.06      | 0.908      | 0.001          | 0.005      |
| <i>HHATL</i>     | 3.12      | 0.901      | 0.001          | 0.005      |
| <i>AVPR1B</i>    | 4.42      | 0.897      | 0.001          | 0.005      |
| <i>VSTM1</i>     | 3.25      | 0.896      | 0.001          | 0.005      |
| <i>ENPP2</i>     | 2.50      | 0.894      | 0.001          | 0.005      |
| <i>PDLIM4</i>    | 3.25      | 0.893      | 0.001          | 0.005      |
| <i>ASAP2</i>     | 3.41      | 0.893      | 0.001          | 0.004      |
| <i>PLEKHG5</i>   | 3.12      | 0.893      | 0.001          | 0.004      |
| <i>UGT2A1</i>    | 2.83      | 0.893      | 0.001          | 0.004      |
| <i>SOCS3</i>     | 2.68      | 0.891      | 0.001          | 0.004      |
| <i>SLIT1</i>     | 3.64      | 0.889      | 0.001          | 0.004      |
| <i>INMT</i>      | 3.05      | 0.884      | 0.002          | 0.004      |
| <i>CHIA</i>      | 2.84      | 0.878      | 0.002          | 0.004      |
| <i>MDFI</i>      | 3.07      | 0.874      | 0.002          | 0.005      |
| <i>FAM92B</i>    | 2.51      | 0.866      | 0.003          | 0.005      |
| <i>GHRHR</i>     | 3.16      | 0.861      | 0.003          | 0.006      |
| <i>ABCB9</i>     | 2.89      | 0.853      | 0.003          | 0.007      |
| <i>HTATSF1</i>   | 2.99      | 0.853      | 0.003          | 0.007      |
| <i>MFAP4</i>     | 3.35      | 0.850      | 0.004          | 0.007      |
| <i>C14orf132</i> | 2.58      | 0.849      | 0.004          | 0.007      |
| <i>ZNF331</i>    | 2.92      | 0.848      | 0.004          | 0.007      |
| <i>PEBP4</i>     | 2.54      | 0.847      | 0.004          | 0.007      |
| <i>GNAL</i>      | 3.51      | 0.842      | 0.004          | 0.008      |
| <i>SHISA9</i>    | 7.58      | 0.838      | 0.005          | 0.008      |
| <i>MYCL1</i>     | 2.60      | 0.831      | 0.006          | 0.009      |
| <i>CACNA2D3</i>  | 4.05      | 0.825      | 0.006          | 0.010      |
| <i>RASD1</i>     | 3.34      | 0.824      | 0.006          | 0.010      |
| <i>GPR68</i>     | 5.00      | 0.824      | 0.006          | 0.010      |
| <i>SHROOM2</i>   | 2.81      | 0.820      | 0.007          | 0.011      |
| <i>ARC</i>       | 2.97      | 0.820      | 0.007          | 0.011      |
| <i>B4GALNT4</i>  | 2.53      | 0.818      | 0.007          | 0.011      |
| <i>VWA5B1</i>    | 2.66      | 0.816      | 0.007          | 0.011      |
| <i>SCUBE1</i>    | 3.25      | 0.790      | 0.011          | 0.016      |
| <i>AOC2</i>      | 2.70      | 0.789      | 0.011          | 0.016      |
| <i>CA4</i>       | 3.12      | 0.783      | 0.013          | 0.018      |



Table S10. Cont.

| Gene    | FC   | PCC   | p Value | FDR   |
|---------|------|-------|---------|-------|
| COL9A3  | 2.78 | 0.782 | 0.013   | 0.018 |
| FOLR1   | 3.01 | 0.777 | 0.014   | 0.019 |
| ADCY5   | 2.62 | 0.768 | 0.016   | 0.021 |
| UNC5A   | 4.04 | 0.758 | 0.018   | 0.023 |
| CNTN2   | 4.19 | 0.757 | 0.018   | 0.023 |
| SEP14   | 2.65 | 0.751 | 0.020   | 0.025 |
| CCDC68  | 3.49 | 0.751 | 0.020   | 0.025 |
| FRMD3   | 3.09 | 0.750 | 0.020   | 0.025 |
| ASCL1   | 2.93 | 0.748 | 0.020   | 0.025 |
| FRMD3   | 3.03 | 0.748 | 0.020   | 0.025 |
| CNKSR1  | 2.51 | 0.736 | 0.024   | 0.028 |
| CYR61   | 2.96 | 0.710 | 0.032   | 0.036 |
| PRRG4   | 2.56 | 0.707 | 0.033   | 0.037 |
| COL8A1  | 2.73 | 0.706 | 0.034   | 0.037 |
| TBX20   | 3.83 | 0.699 | 0.036   | 0.039 |
| GH2     | 4.57 | 0.689 | 0.040   | 0.042 |
| RAMP1   | 2.53 | 0.678 | 0.045   | 0.047 |
| FAM107B | 2.55 | 0.674 | 0.047   | 0.047 |
| LMX1A   | 3.94 | 0.674 | 0.047   | 0.047 |
| MAMLD1  | 3.60 | 0.673 | 0.047   | 0.047 |
| DRD2    | 2.64 | 0.670 | 0.048   | 0.048 |

Table S11. Cortisol highly related-genotypes.

| Gene      | FC   | Blood F<br>8 AM | Blood F<br>0 AM | 24 h UFC<br>(Control) | 24 h UFC (Control)<br>Small Doses of the<br>Second Day | 24 h UFC (Control)<br>High Doses of the<br>Second Day |
|-----------|------|-----------------|-----------------|-----------------------|--------------------------------------------------------|-------------------------------------------------------|
| SHISA9    | 7.58 | 0.75            | —               | —                     | —                                                      | —                                                     |
| GPR50     | 3.15 | 0.74            | 0.98            | —                     | —                                                      | —                                                     |
| PPP1R1B   | 4.18 | 0.71            | 0.88            | —                     | —                                                      | —                                                     |
| HHATL     | 3.12 | 0.69            | 0.92            | —                     | —                                                      | —                                                     |
| ASAP2     | 3.41 | 0.69            | 0.91            | —                     | —                                                      | —                                                     |
| PLEKHG5   | 3.12 | 0.69            | 0.91            | —                     | —                                                      | —                                                     |
| PDLIM4    | 3.25 | 0.69            | 0.91            | —                     | —                                                      | —                                                     |
| UGT2A1    | 2.83 | 0.69            | 0.91            | —                     | —                                                      | —                                                     |
| PNMT      | 3.51 | 0.68            | 0.90            | —                     | —                                                      | —                                                     |
| ENPP2     | 2.50 | 0.68            | 0.92            | —                     | —                                                      | —                                                     |
| AHRR      | 2.65 | 0.67            | 0.91            | —                     | —                                                      | —                                                     |
| CHIA      | 2.84 | —               | 0.97            | —                     | —                                                      | —                                                     |
| TNFAIP8L3 | 3.12 | —               | 0.93            | —                     | —                                                      | —                                                     |
| LRRC10B   | 2.73 | —               | 0.91            | —                     | —                                                      | —                                                     |
| CREB3L1   | 3.82 | —               | 0.93            | —                     | —                                                      | —                                                     |
| CELSR1    | 2.53 | —               | 0.88            | —                     | —                                                      | —                                                     |
| STRC      | 3.06 | —               | 0.95            | —                     | —                                                      | —                                                     |
| VSTM1     | 3.25 | —               | —               | 0.72                  | —                                                      | —                                                     |
| SLIT1     | 3.64 | —               | 0.89            | —                     | —                                                      | —                                                     |
| INMT      | 3.05 | —               | 0.89            | —                     | —                                                      | —                                                     |
| GHRHR     | 3.16 | —               | 0.92            | —                     | —                                                      | —                                                     |
| ABCB9     | 2.89 | —               | 0.91            | —                     | —                                                      | —                                                     |
| MFAP4     | 3.35 | —               | 0.93            | —                     | —                                                      | —                                                     |
| C14orf132 | 2.58 | —               | 0.89            | —                     | —                                                      | —                                                     |
| SHROOM2   | 2.81 | —               | 0.88            | —                     | —                                                      | —                                                     |
| VWA5B1    | 2.66 | —               | 0.89            | —                     | —                                                      | —                                                     |
| AOC2      | 2.70 | —               | 0.91            | —                     | —                                                      | —                                                     |
| CA4       | 3.12 | —               | 0.89            | —                     | —                                                      | —                                                     |

Table S11. Cont.

| Gene     | FC   | Blood F<br>8 AM | Blood F<br>0 AM | 24 h UFC<br>(Control) | 24 h UFC (Control)<br>Small Doses of the<br>Second Day | 24 h UFC (Control)<br>High Doses of the<br>Second Day |
|----------|------|-----------------|-----------------|-----------------------|--------------------------------------------------------|-------------------------------------------------------|
| CCDC68   | 3.49 | —               | 0.91            | —                     | —                                                      | —                                                     |
| FRMD3    | 3.03 | —               | 0.92            | —                     | —                                                      | —                                                     |
| CNKSR1   | 2.51 | —               | 0.93            | —                     | —                                                      | —                                                     |
| PRRG4    | 2.56 | —               | 0.90            | —                     | —                                                      | —                                                     |
| TFPI2    | 3.27 | —               | 0.99            | —                     | —                                                      | —                                                     |
| SCUBE1   | 3.25 | —               | 0.98            | —                     | —                                                      | —                                                     |
| CYFIP2   | 2.69 | —               | —               | 0.72                  | —                                                      | —                                                     |
| KIAA1024 | 5.94 | —               | 0.00            | —                     | 0.76                                                   | —                                                     |
| RAB40C   | 2.64 | —               | 0.00            | —                     | 0.91                                                   | 0.73                                                  |
| ELMOD1   | 2.74 | —               | 0.91            | —                     | —                                                      | —                                                     |
| SCOC     | 3.96 | —               | 0.91            | —                     | —                                                      | —                                                     |
| PPP1R27  | 2.71 | —               | 0.88            | —                     | —                                                      | —                                                     |
| FBLN1    | 2.85 | —               | 0.90            | —                     | —                                                      | —                                                     |
| DTNA     | 4.99 | —               | —               | 0.79                  | —                                                      | —                                                     |
| ACAN     | 4.24 | —               | -0.90           | —                     | —                                                      | —                                                     |
| CRHR1    | 4.10 | —               | —               | —                     | 0.75                                                   | 0.78                                                  |
| MAMLD1   | 3.31 | —               | 0.89            | —                     | —                                                      | —                                                     |
| C3orf72  | 4.57 | —               | 0.98            | —                     | —                                                      | —                                                     |
| TNNT2    | 4.04 | —               | —               | —                     | 0.72                                                   | 0.76                                                  |
| DIO2     | 3.92 | —               | —               | 0.68                  | —                                                      | —                                                     |
| NELL2    | 3.73 | —               | —               | 0.74                  | —                                                      | —                                                     |
| NCOA7    | 3.33 | —               | 0.90            | —                     | 0.71                                                   | 0.75                                                  |
| SKAP1    | 3.24 | —               | —               | 0.79                  | —                                                      | —                                                     |
| RIAD1    | 3.08 | —               | —               | 0.69                  | —                                                      | —                                                     |
| MGP      | 3.08 | —               | 0.88            | —                     | —                                                      | —                                                     |
| C19orf33 | 2.95 | —               | —               | 0.68                  | —                                                      | —                                                     |
| SMAD3    | 2.81 | —               | —               | 0.79                  | —                                                      | —                                                     |
| MFAP2    | 2.77 | —               | —               | 0.79                  | —                                                      | —                                                     |
| S100A13  | 2.62 | —               | —               | 0.79                  | —                                                      | —                                                     |
| LSP1     | 2.60 | —               | 0.89            | —                     | —                                                      | —                                                     |
| PRR5     | 2.52 | —               | 0.91            | —                     | —                                                      | —                                                     |
| CPNE4    | 2.88 | -0.69           | —               | —                     | —                                                      | —                                                     |
| SLC38A3  | 2.96 | -0.69           | —               | —                     | —                                                      | —                                                     |
| CNGA3    | 2.67 | -0.69           | —               | —                     | —                                                      | —                                                     |
| PPIF     | 2.58 | -0.70           | —               | —                     | —                                                      | —                                                     |
| SCN1B    | 3.06 | -0.71           | —               | —                     | —                                                      | —                                                     |
| FLRT1    | 2.83 | -0.72           | —               | —                     | —                                                      | —                                                     |
| APOL4    | 2.97 | -0.73           | —               | —                     | —                                                      | —                                                     |
| PPAPDC1A | 2.82 | -0.75           | —               | —                     | —                                                      | -0.71                                                 |
| OXT      | 2.61 | -0.80           | —               | —                     | —                                                      | —                                                     |

—:  $p$  value > 0.05.

**Table S12.** LH highly related-genotypes.

| <b>Gene</b>         | <b>FC</b> | <b>PCC</b> | <b>p Value</b> | <b>FDR</b> |
|---------------------|-----------|------------|----------------|------------|
| <i>POU1F1</i>       | 6.26      | 0.922      | <0.001         | 0.017      |
| <i>DRD2</i>         | 2.85      | 0.898      | 0.001          | 0.021      |
| <i>LHB</i>          | 2.64      | 0.895      | 0.001          | 0.015      |
| <i>ALDOB</i>        | 2.73      | 0.886      | 0.001          | 0.015      |
| <i>TBX20</i>        | 3.83      | 0.874      | 0.002          | 0.017      |
| <i>GH2</i>          | 4.57      | 0.870      | 0.002          | 0.016      |
| <i>LOC100507588</i> | 3.38      | 0.865      | 0.003          | 0.015      |
| <i>GPR50</i>        | 3.15      | 0.862      | 0.003          | 0.014      |
| <i>HSPB3</i>        | 5.62      | 0.849      | 0.004          | 0.017      |
| <i>SEP14</i>        | 2.65      | 0.829      | 0.006          | 0.023      |
| <i>APLN</i>         | 2.59      | 0.816      | 0.007          | 0.027      |
| <i>DRD2</i>         | 2.64      | 0.805      | 0.009          | 0.030      |
| <i>CNTN2</i>        | 4.19      | 0.799      | 0.010          | 0.031      |
| <i>DLK1</i>         | 4.87      | 0.797      | 0.010          | 0.029      |
| <i>HMP19</i>        | 3.37      | 0.796      | 0.010          | 0.028      |
| <i>LYVE1</i>        | 3.38      | 0.782      | 0.013          | 0.033      |
| <i>MAMLD1</i>       | 3.60      | 0.773      | 0.014          | 0.035      |
| <i>MARCO</i>        | 2.72      | 0.772      | 0.015          | 0.034      |
| <i>COL9A3</i>       | 2.78      | 0.769      | 0.015          | 0.033      |
| <i>SCUBE1</i>       | 3.25      | 0.753      | 0.019          | 0.039      |
| <i>GNA14</i>        | 3.88      | 0.752      | 0.019          | 0.038      |
| <i>COL8A1</i>       | 2.73      | 0.746      | 0.021          | 0.037      |
| <i>SERTM1</i>       | 4.45      | 0.746      | 0.021          | 0.036      |
| <i>MEGF11</i>       | 3.67      | 0.744      | 0.022          | 0.035      |
| <i>TFPI2</i>        | 3.27      | 0.743      | 0.022          | 0.034      |
| <i>FLRT1</i>        | 2.83      | 0.740      | 0.023          | 0.035      |
| <i>LMX1A</i>        | 3.94      | 0.738      | 0.023          | 0.034      |
| <i>MDK</i>          | 2.98      | 0.736      | 0.024          | 0.034      |
| <i>MYCL1</i>        | 2.60      | 0.735      | 0.024          | 0.033      |
| <i>CHIA</i>         | 2.84      | 0.732      | 0.025          | 0.033      |
| <i>ANKS1B</i>       | 2.54      | 0.725      | 0.027          | 0.035      |
| <i>ZNF331</i>       | 2.92      | 0.719      | 0.029          | 0.036      |
| <i>POU1F1</i>       | 3.95      | 0.712      | 0.031          | 0.038      |
| <i>FAM92B</i>       | 2.51      | 0.701      | 0.035          | 0.041      |
| <i>PMAIP1</i>       | 4.66      | 0.692      | 0.039          | 0.044      |
| <i>GNAL</i>         | 3.51      | 0.687      | 0.041          | 0.045      |
| <i>ARC</i>          | 2.97      | 0.683      | 0.043          | 0.046      |
| <i>CYFIP2</i>       | 3.22      | 0.668      | 0.049          | 0.052      |
| <i>RARA</i>         | 3.51      | 0.668      | 0.049          | 0.050      |
| <i>CDH20</i>        | 2.64      | 0.668      | 0.049          | 0.049      |
| <i>IL20RA</i>       | 2.53      | -0.750     | 0.020          | 0.037      |

**Table S13.** E2 highly related-genotypes.

| <b>Gene</b>    | <b>FC</b> | <b>PCC</b> | <b>p Value</b> | <b>FDR</b> |
|----------------|-----------|------------|----------------|------------|
| <i>FXVD1</i>   | 4.53      | 0.952      | <0.001         | 0.001      |
| <i>CBFA2T2</i> | 3.25      | 0.940      | <0.001         | 0.001      |
| <i>FSTL5</i>   | 2.84      | 0.939      | <0.001         | 0.001      |
| <i>CBS</i>     | 4.15      | 0.934      | <0.001         | 0.001      |
| <i>B3GAT1</i>  | 2.95      | 0.934      | <0.001         | 0.001      |
| <i>SEZ6L</i>   | 3.88      | 0.934      | <0.001         | <0.001     |
| <i>FGF13</i>   | 4.07      | 0.933      | <0.001         | <0.001     |
| <i>PRR5</i>    | 2.58      | 0.722      | 0.028          | 0.030      |
| <i>FGF12</i>   | 3.12      | 0.705      | 0.034          | 0.034      |

**Table S14.** Information of five selected genes.

| ID           | N1    |        | N2    |       | N3    |       | N4    |        | N5    |       | N6    |        | N7    |       | N8    |        | N9    |       | Differential Recurrence | DI     | Avg (Tumor) | Avg (ANPTs) | Gene Symbol | Chr   |
|--------------|-------|--------|-------|-------|-------|-------|-------|--------|-------|-------|-------|--------|-------|-------|-------|--------|-------|-------|-------------------------|--------|-------------|-------------|-------------|-------|
|              | Tumor | ANPTs  | Tumor | ANPTs | Tumor | ANPTs | Tumor | ANPTs  | Tumor | ANPTs | Tumor | ANPTs  | Tumor | ANPTs | Tumor | ANPTs  | Tumor | ANPTs |                         |        |             |             |             |       |
| NM_001146    | 0.66  | 2.88   | 0.00  | 2.37  | 0.01  | 3.50  | 2.69  | 2.01   | 2.22  | 6.27  | 0.00  | 10.09  | 5.94  | 5.73  | 1.33  | 7.52   | 0.02  | 13.19 | 7                       | -0.693 | 1.431       | 5.951       | ANGPT1      | chr8  |
| NM_000088    | 40.10 | 5.07   | 43.31 | 9.33  | 77.52 | 7.59  | 5.41  | 7.36   | 16.26 | 6.24  | 21.30 | 3.31   | 12.44 | 3.88  | 24.57 | 4.79   | 24.26 | 5.71  | 8                       | 0.668  | 29.463      | 5.921       | COL1A1      | chr17 |
| NM_002526    | 15.62 | 1.62   | 18.26 | 2.64  | 13.47 | 1.33  | 3.39  | 1.73   | 8.57  | 2.10  | 31.88 | 2.07   | 3.84  | 5.18  | 4.71  | 1.69   | 17.51 | 3.64  | 7                       | 0.667  | 13.027      | 2.445       | NT5E        | chr6  |
| NM_002775    | 19.77 | 134.27 | 11.63 | 98.22 | 9.45  | 70.44 | 87.43 | 111.71 | 38.47 | 79.78 | 8.71  | 108.97 | 68.77 | 97.49 | 10.90 | 121.24 | 9.96  | 68.46 | 7                       | -0.702 | 29.454      | 98.956      | HTRA1       | chr10 |
| NM_001040058 | 39.45 | 1.44   | 37.05 | 0.95  | 7.99  | 1.54  | 3.06  | 0.85   | 1.41  | 3.42  | 87.76 | 0.54   | 0.00  | 0.93  | 33.11 | 2.06   | 11.36 | 1.19  | 9                       | 0.634  | 24.577      | 1.437       | SPP1        | chr4  |

Table S15. Primer sequences.

| Gene Symbol | Forward (5' to 3')      | Reverse (5' to 3')      |
|-------------|-------------------------|-------------------------|
| SPP1        | GCATTCCGATGTGATTGAT     | GTCTACAACCAGCATATCTTC   |
| COL1A1      | CACGACAAAGCAGAAACA      | ATCAAGACAAGAACGAGGTA    |
| NT5E        | GATGGCTCCTCTCAATCA      | TGTGTCTCAGGTTGTTGT      |
| HTRA1       | ACGGTGAAGTGATTGGAA      | TGAGTGACATCATTCCGATA    |
| ANGPT1      | CCGAGCCTATTCACAGTAT     | AATCAGCACCGTGTAAGA      |
| GAPDH       | GGTGGTCTCCTCTGACTTCAACA | GTTGCTGTAGCCAAATTCGTTGT |

Table S16. Full name and unit of clinical indexes.

| ID | Clinical Indexes                                  | Full Name                                                                 | Unit                |
|----|---------------------------------------------------|---------------------------------------------------------------------------|---------------------|
|    | Tumor size                                        |                                                                           |                     |
| 1  | Maximum diameter                                  | Maximum diameter                                                          | mm                  |
| 2  | Gross tumor volume                                | Gross tumor volume                                                        | mm <sup>3</sup>     |
|    | ACTH-secreting pituitary adenoma related hormones |                                                                           |                     |
| 3  | ACTH 8 AM                                         | 8 AM plasma adrenocorticotrophic hormone level                            | pg/mL               |
| 4  | 8 AM F                                            | 8AM total serum cortisol level                                            | ug/dL               |
| 5  | 0 AM F                                            | Midnight AM total serum cortisol level                                    | ug/dL               |
| 6  | 24 h UFC (control)                                | 24-h Urinary-free cortisol test (control)                                 | ug                  |
| 7  | 24 h UFC (low-dose DST)                           | 24-h Urinary cortisol level<br>(low-dose dexamethasone suppression test)  | ug                  |
| 8  | 24 h UFC (high-dose DST)                          | 24-h urinary cortisol level<br>(high-dose dexamethasone suppression Test) | ug                  |
|    | Other pituitary related hormones                  |                                                                           |                     |
| 9  | GH                                                | Growth hormone                                                            | ng/mL               |
| 10 | IGF-1                                             | Insulinlike growth factor 1                                               | ng/mL               |
| 11 | LH                                                | Luteinizing hormone                                                       | mIU/mL              |
| 12 | FSH                                               | Follicle-stimulating hormone                                              | mIU/mL              |
| 13 | E2                                                | Estradiol                                                                 | pg/mL               |
| 14 | PRL                                               | Prolactin                                                                 | ng/mL               |
| 15 | TSTO                                              | Testosterone                                                              | ng/dL               |
| 16 | PROG                                              | Progesterone                                                              | ng/mL               |
| 17 | FT3                                               | Serum free triiodothyronine                                               | pg/mL               |
| 18 | FT4                                               | Serum free thyroxine                                                      | ng/dL               |
| 19 | T3                                                | Triiodothyronine                                                          | ng/mL               |
| 20 | T4                                                | Thyroxine                                                                 | ug/dL               |
| 21 | TSH                                               | Serum thyroid stimulating hormone                                         | uIU/mL              |
|    | Bone metabolism                                   |                                                                           |                     |
| 22 | PTH                                               | Serum parathyroid hormone                                                 | pg/mL               |
| 23 | P                                                 | Serum calcium                                                             | mmol/L              |
| 24 | Ca                                                | Serum phosphate                                                           | mmol/L              |
| 25 | ALP                                               | Serum alkaline phosphatase                                                | U/L                 |
|    | Age-matched bone mineral density (BMD)            |                                                                           |                     |
| 26 | L1                                                | First lumbar Z-score                                                      | score               |
| 27 | L2                                                | Second lumbar Z-score                                                     | score               |
| 28 | L3                                                | Third Lumbar Z-score                                                      | score               |
| 29 | L4                                                | Fourth Lumbar Z-score                                                     | score               |
| 30 | L1-2                                              | lumbar 1-2 Z-score                                                        | score               |
| 31 | L1-4                                              | lumbar 1-4 Z-score                                                        | score               |
| 32 | L2-4                                              | lumbar 2-4 Z-score                                                        | score               |
| 33 | Neck of femur                                     | Neck of femur Z-score                                                     | score               |
| 34 | Greater trochanter                                | Greater trochanter Z-score                                                | score               |
| 35 | Total Haunch Bone                                 | Total haunch bone Z-score                                                 | score               |
|    | Routine blood chemistry                           |                                                                           |                     |
| 36 | WAC                                               | White blood cell                                                          | 10 <sup>9</sup> /L  |
| 37 | LY% (%)                                           | Lymphocyte                                                                | %                   |
| 38 | MONO% (%)                                         | Monocyte                                                                  | %                   |
| 39 | NEUT% (%)                                         | Ueutrophile granulocyte                                                   | %                   |
| 40 | EOS (%)                                           | Eosnophils                                                                | %                   |
| 41 | BASO (%)                                          | Basophilic granulocyte                                                    | %                   |
| 42 | LUC (%)                                           | Large unstained cell                                                      | %                   |
| 43 | LY#                                               | Lymphocyte                                                                | 10 <sup>9</sup> /L  |
| 44 | MONO#                                             | Monocyte                                                                  | 10 <sup>9</sup> /L  |
| 45 | NEUT#                                             | Neutrophile granulocyte                                                   | 10 <sup>9</sup> /L  |
| 46 | EOS#                                              | Eosnophils                                                                | 10 <sup>9</sup> /L  |
| 47 | BASO#                                             | Basophilic granulocyte                                                    | 10 <sup>9</sup> /L  |
| 48 | RBC                                               | Red blood cell                                                            | 10 <sup>12</sup> /L |
| 49 | HGB                                               | Hemoglobin                                                                | g/L                 |

Table S16. Cont.

| ID                             | Clinical Indexes | Full Name                                 | Units              |
|--------------------------------|------------------|-------------------------------------------|--------------------|
| 50                             | HCT              | Hematocrit                                | %                  |
| 51                             | MCV              | Mean corpuscular volume                   | fl                 |
| 52                             | MCHC             | Mean corpuscular hemoglobin concentration | g/L                |
| 53                             | MCH              | Mean corpuscular hemoglobin               | pg                 |
| 54                             | CHCM             | Cellular hemoglobin concentration mean    | g/L                |
| 55                             | CH               | Cellular hemoglobin                       | pg                 |
| 56                             | RDW-C            | Red cell distribution width               | %                  |
| 57                             | HDW              | Hemoglobin distribution width             | %                  |
| 58                             | PLT              | Platelets                                 | 10 <sup>9</sup> /L |
| 59                             | PCT              | Plateletcrit                              | %                  |
| 60                             | PDW              | Platelet distribution width               | %                  |
| 61                             | MPV              | Mean platelet volume                      | fl                 |
| 62                             | ESR              | Erythrocyte sedimentation rate            | mm/h               |
| Cardiovascular related indexes |                  |                                           |                    |
| 63                             | hsCRP            | High sensitivity C reactive protein       | mg/L               |
| 64                             | SBP              | Systolic blood pressure                   | mmHg               |
| 65                             | DBP              | Diastolic blood pressure                  | mmHg               |
| Liver function                 |                  |                                           |                    |
| 66                             | ALT              | Alanine aminotransferase                  | U/L                |
| 67                             | TP               | Total protein                             | g/L                |
| 68                             | Alb              | Albumin                                   | g/L                |
| 69                             | A/G              | Albumin/globulin                          | ratio              |
| 70                             | Tbil             | Total bilirubin                           | umol/L             |
| 71                             | Dbil             | Direct bilirubin                          | umol/L             |
| 72                             | GGT              | $\gamma$ -glutamyl transpeptidase         | U/L                |
| 73                             | AST              | Aspartic acid transaminase                | U/L                |
| 74                             | TBA              | Total bile acids                          | umol/L             |
| 75                             | LD               | Lactic dehydrogenase                      | U/L                |
| 76                             | ChE              | Acetylcholine esterase                    | kU/L               |
| 77                             | ADA              | Adenosine deaminase                       | U/L                |
| 78                             | PA               | Prealbumin                                | mg/L               |
| Electrolyte                    |                  |                                           |                    |
| 79                             | K                | Kalium                                    | mmol/L             |
| 80                             | Na               | Sodium                                    | mmol/L             |
| 81                             | Cl               | Chlorine                                  | mmol/L             |
| 82                             | TCO <sub>2</sub> | Total carbon dioxide                      | mmol/L             |
| Renal function                 |                  |                                           |                    |
| 83                             | Cr(E)            | Creatinine                                | umol/L             |
| 84                             | Urea             | Urea                                      | mmol/L             |
| 85                             | Glu              | Glutamic acid                             | mmol/L             |
| 86                             | UA               | Uric acid                                 | umol/L             |
| Lipid metabolism               |                  |                                           |                    |
| 87                             | TC               | Total cholesterol                         | mmol/L             |
| 88                             | TG               | Triglyceride                              | mmol/L             |
| 89                             | HDL-C            | High-density lipoprotein cholesterol      | mmol/L             |
| 90                             | LDL-C            | Low-density lipoprotein cholesterol       | mmol/L             |
| 91                             | ApoA1            | Apolipoprotein A1                         | g/L                |
| 92                             | ApoB             | Apolipoprotein B                          | g/L                |
| 93                             | Lp(a)            | Lipoprotein                               | mg/L               |
| 94                             | FFA              | Free fatty acid                           | umol/L             |
| Glycometabolism                |                  |                                           |                    |
| 95                             | blood glucose    | Blood glucose                             | mmol/L             |
| 96                             | GLU 0 min        | Glucose 0 min                             | mmol/L             |
| 97                             | INS 0 min        | Insulin 0 min                             | uIU/mL             |
| 98                             | GLU 30 min       | Glucose 30 min                            | mmol/L             |
| 99                             | INS 30 min       | Insulin 30 min                            | uIU/mL             |
| 100                            | GLU 60 min       | Glucose 60 min                            | mmol/L             |
| 101                            | INS 60 min       | Insulin 60 min                            | uIU/mL             |
| 102                            | GLU 120 min      | Glucose 120 min                           | mmol/L             |
| 103                            | INS 120 min      | Insulin 120 min                           | uIU/mL             |
| 104                            | GLU 180 min      | Glucose 180 min                           | mmol/L             |
| 105                            | INS 180 min      | Insulin 180 min                           | uIU/mL             |
| 106                            | HbA1c            | Glycosylated hemoglobin                   | %                  |
